# **Perceptual and Semantic Representations at Encoding Contribute to True and False Recognition of Objects**

Loris Naspi<sup>1</sup>, Paul Hoffman<sup>1</sup>, Barry Devereux<sup>2</sup>, and Alexa Morcom<sup>3</sup>

<sup>1</sup> School of Philosophy, Psychology and Language Sciences, University of Edinburgh, EH8

9JZ

<sup>2</sup> School of Electronics, Electrical Engineering and Computer Science, Queen's University

Belfast, BT9 5BN

<sup>3</sup> School of Psychology, University of Sussex, BN1 9QH

Correspondence should be addressed to Loris Naspi at [Loris.Naspi@ed.ac.uk](mailto:Loris.Naspi@ed.ac.uk)

Number of pages: 53

Number of figures: 8

Number of tables: 2

Number of words for abstract: 236

Number of words for introduction: 648

Number of words for discussion: 1427

The authors declare no competing financial interests

Acknowledgments: P.H was supported by a BBSRC New investigator grant (BB/T004444/1)

Author contributions: L.N., P.H., B.D., and A.M. designed research; L.N. performed research; L.N. analyzed data; L.N., P.H., B.D., and A.M. wrote the paper

1  
2  
3  
4  
5  
6  
7  
8  
9  
10  
11  
12  
13  
14  
15  
16  
17  
18  
19  
20  
21  
22  
23  
24  
25

## Abstract

When encoding new episodic memories, visual and semantic processing are proposed to make distinct contributions to accurate memory and memory distortions. Here, we used functional magnetic resonance imaging (fMRI) and representational similarity analysis to uncover the representations that predict true and false recognition of unfamiliar objects. Two semantic models captured coarse-grained taxonomic categories and specific object features, respectively, while two perceptual models embodied low-level visual properties. Twenty-eight female and male participants encoded images of objects during fMRI scanning, and later had to discriminate studied objects from similar lures and novel objects in a recognition memory test. Both perceptual and semantic models predicted true memory. When studied objects were later identified correctly, neural patterns corresponded to low-level visual representations of these object images in the early visual cortex, lingual, and fusiform gyri. In a similar fashion, alignment of neural patterns with fine-grained semantic feature representations in the fusiform gyrus also predicted true recognition. However, emphasis on coarser taxonomic representations predicted forgetting more anteriorly in ventral anterior temporal lobe, left perirhinal cortex, and left inferior frontal gyrus. In contrast, false recognition of similar lure objects was associated with weaker visual analysis posteriorly in early visual and left occipitotemporal cortex. The results implicate multiple perceptual and semantic representations in successful memory encoding and suggest that fine-grained semantic as well as visual analysis contributes to accurate later recognition, while processing visual image detail is critical for avoiding false recognition errors.

26  
27  
28  
29  
30  
31  
32  
33  
34  
35  
36  
37  
38  
39  
40  
41  
42  
43  
44  
45  
46  
47  
48  
49  
50

## Significance Statement

People are able to store detailed memories of many similar objects. We offer new insights into the encoding of these specific memories by combining fMRI with explicit models of how image properties and object knowledge are represented in the brain. When people processed fine-grained visual properties in occipital and inferior temporal cortex, they were more likely to be recognize the objects later, and less likely to falsely recognize similar objects. In contrast, while object-specific feature representations in fusiform predicted accurate memory, coarse-grained categorical representations in frontal and temporal regions predicted forgetting. The data provide the first direct tests of theoretical assumptions about encoding true and false memories, suggesting that semantic representations contribute to specific memories as well as errors.

51

## Introduction

52 Humans are able to remember objects in great detail and discriminate them in memory from  
53 others that are similar in appearance and type (Standing, 1973). To achieve this, highly  
54 specific memories must be encoded. Successful object encoding engages diverse cortical  
55 regions alongside the hippocampus (Kim, 2011). These areas intersect with networks  
56 involved in visual object processing and semantic cognition (Binder et al., 2009; Clarke and  
57 Tyler, 2014). However, little is known about the neural operations these regions support  
58 during encoding. According to fuzzy-trace theory, the specific memory traces that contribute  
59 to true recognition depend on encoding of perceptual features, while semantic gist  
60 representations promote both true and false recognition (Brainerd and Reyna, 1990).  
61 However, recent data suggest that perceptual relations between studied items and lures can  
62 also trigger false recognition (Naspi et al., 2020). Here, we used functional magnetic  
63 resonance imaging (fMRI) and representational similarity analysis (RSA) to investigate the  
64 perceptual and semantic representations engaged that allow people to recognize these same  
65 objects later among perceptually and semantically similar lures.

66

67 In line with fuzzy-trace theory, a few fMRI studies have shown stronger activation in  
68 occipito-temporal regions when people later successfully recognize specific studied objects  
69 than when they misrecognize similar lures (Garoff et al., 2005; Gonsalves et al., 2004; Okado  
70 and Stark, 2005). However, activation of similar posterior areas has also been associated with  
71 later false recognition (Garoff et al., 2005), and activation in left inferior frontal gyrus – a  
72 region typically associated with semantic processing – with later true recognition (Pidgeon  
73 and Morcom, 2016). Such results appear to challenge any simple mapping between  
74 perceptual and semantic processing and true and false recognition (see also Naspi et al.,  
75 2020). However, one cannot infer type of processing based on presence or absence of

76 activation alone. Here, we investigated the underlying processes that give rise to such effects,  
77 using RSA to test whether patterns of neural similarity that indicate visual and semantic  
78 processing predict subsequent memory performance.

79

80 Object recognition involves visual analysis and the computation of meaning, proceeding in an  
81 informational gradient along the ventral visual pathway (Clarke and Tyler, 2015). The coarse  
82 semantic identity of an object emerges gradually from vision in posterior cortices including  
83 lingual, fusiform, parahippocampal, and inferior temporal gyri that integrate semantic  
84 features capturing taxonomic relationships (Devereux et al., 2013; Mahon et al., 2009; Tyler  
85 et al., 2013). The lingual and fusiform gyri in particular are also engaged when memories of  
86 objects are encoded (Kim, 2011). At the apex of the ventral pathway, the perirhinal cortex  
87 provides the finer-grained feature integration required to differentiate similar objects (Clarke  
88 and Tyler, 2014; Devlin and Price, 2007; Winters and Bussey, 2005), and activation here  
89 predicts later memory for specific objects (Chen et al., 2019). Other researchers ascribe this  
90 role more broadly to the anterior ventral temporal cortex, considered a semantic hub that  
91 integrates modality-specific features into transmodal conceptual representations (Lambon  
92 Ralph et al., 2017). Beyond the ventral stream, left inferolateral prefrontal regions supporting  
93 controlled, selective semantic processing are also critical for memory encoding (Gabrieli et  
94 al., 1998; Kim, 2011).

95

96 According to theory, the perceptual and semantic representations encoded in memory traces  
97 reflect how items were originally processed ( Craik and Lockhart, 1972; Otten and Rugg,  
98 2001). We therefore expected that some of these ventral pathway and inferior frontal  
99 representations would be revealed in distinct distributed activity patterns giving rise to later  
100 true and false recognition. We quantified perceptual representations in terms of low-level

101 visual attributes of object images, and semantic representations of the objects' concepts in  
102 terms of their coarse taxonomic category membership as well as their specific semantic  
103 features. We used these models to identify representational similarity patterns between  
104 objects at encoding using a novel approach that combined RSA and the subsequent memory  
105 paradigm in a single step. This allowed us to test where the strength of perceptual and  
106 semantic object representations predicts subsequent accurate memory and false recognition of  
107 similar lures.

## 108 **Materials and Methods**

### 109 *Participants*

110 Twenty-eight right-handed adults aged 18-35 years underwent fMRI scanning ( $M = 23.07$   
111 years,  $SD = 3.54$ ; 18 females, 10 males). Data from a further 4 participants were excluded  
112 due to technical failures. All participants also spoke English fluently (i.e., had spoken English  
113 since the age of 5 or lived in an English-speaking country for at least 10 years) and had  
114 normal or corrected-to-normal vision. Exclusion criteria were a history of a serious systemic  
115 psychiatric, medical or a neurological condition, visual issues precluding good visibility of  
116 the task in the scanner, and standard MRI exclusion criteria (see <https://osf.io/ypmdj> for  
117 preregistered criteria). Participants were compensated financially. They were contacted by  
118 local advertisement and provided informed consent. The study was approved by the  
119 University of Edinburgh Psychology Research Ethics Committee (Ref. 116-1819/1). All the  
120 following procedures were pre-registered unless otherwise specified.

### 121 *Stimuli*

122 Stimuli were pictures of objects corresponding to 491 of the 638 basic-level concepts in The  
123 Centre for Speech, Language and the Brain concept property norms (the CSLB norms;  
124 Devereux et al., 2014). These were members of 24 superordinate categories (*Appliance, Bird,*

125 *Body Part, Clothing, Container, Drink, Fish, Flower, Food, Fruit, Furniture, Invertebrate,*  
126 *Kitchenware, Land Animal, Miscellaneous, Music, Sea Creature, Tool, Toy, Tree, Vegetable,*  
127 *Vehicle, Water Vehicle, Weapon*), and 238 were living things and 253 non-living things. We  
128 sourced two images for each basic-level concept. Of the 982 images, 180 were a subset of the  
129 images used by Clarke and Tyler (2014), 180 were compiled from the Bank of Standardized  
130 Stimuli (BOSS; Brodeur et al., 2014) and the remaining 622 were taken from the Internet.  
131 Each study list included single exemplar images of either 328 or 327 concepts. Of these, half  
132 were subsequently tested as old and half were subsequently tested test as lures. Each test list  
133 consisted of 491 items: 164 (or 163) studied images, 164 (or 163) similar lures (i.e., images  
134 of different exemplars of studied basic-level concepts), and 163 (or 164) novel items (i.e.,  
135 images of basic-level concepts that had not been studied). Three filler trials prefaced the test  
136 phase. For each participant, living and non-living concepts were randomly allocated to the  
137 conditions with equal probability, i.e., to be studied/lure or novel items. Each study and test  
138 list was presented in a unique random trial order.

### 139 *Procedure*

140 The experiment comprised a scanned encoding phase followed by a recognition test phase  
141 outside the scanner. Stimuli were presented using MATLAB 2019b (The MathWorks Inc.,  
142 2019) and PsychToolbox (Version 2.0.14; Kleiner et al., 2007). In the scanner, stimuli were  
143 viewed on a back-projection screen via a mirror attached to the head coil. Earplugs were  
144 employed to reduce scanner noise, and head motion was minimized using foam pads. During  
145 the study phase participants viewed one image at a time, and they were asked to judge  
146 whether the name of each object started with a consonant or with a vowel, responding with  
147 either index finger via handheld fiber-optic response triggers. By requiring participants to  
148 retrieve the object names, we ensured that they processed the stimuli at both visual and  
149 semantic levels. Participants were not informed of a later memory test. Images were

150 presented centrally against a white background for 500 ms. This was followed by a black  
151 fixation cross with duration sampled from integer values of 2 to 10 s with a flat distribution,  
152 and then a red fixation cross of 500 ms prior to the next trial, for a stimulus onset asynchrony  
153 (SOA) of 3-11 s ( $M = 6$ ). At test, participants viewed one image at a time for 3 s followed by  
154 a black fixation cross for 500 ms, and they judged each picture as “old” or “new” indicating  
155 at the same time whether this judgment was accompanied by high or low confidence using  
156 one of 4 responses on a computer keyboard. Mappings of responses to hands were  
157 counterbalanced at both encoding and retrieval.

### 158 *fMRI acquisition*

159 Images were acquired with a Siemens Magnetom Skyra 3T scanner at the Queen’s Medical  
160 Research Centre (QMRI) at the Royal Infirmary of Edinburgh. T2\*-weighted functional  
161 images were collected by acquiring multiple echo-time sequences for each echo-planar  
162 functional volume (repetition time (TR) = 1700 ms, echo time (TE) = 13 ms (echo-1), 31  
163 (echo-2) ms, and 49 ms (echo-3)). Functional data were collected over 4 scanner runs of 360  
164 volumes, each containing 46 slices (interleaved acquisition;  $80 \times 80$  matrix;  $3 \text{ mm} \times 3 \text{ mm} \times$   
165  $3 \text{ mm}$ , flip angle =  $73^\circ$ ). Each functional session lasted  $\sim 10$  min. Before functional scanning,  
166 high-resolution T1-weighted structural images were collected with TR = 2620 ms, TE = 4.9  
167 ms, a 24-cm field of view (FOV), and a slice thickness of 0.8-mm. Two field map magnitude  
168 images (TE = 4.92 ms and 7.38 ms) and a phase difference image were collected after the 2<sup>nd</sup>  
169 functional run. At the end, T2-weighted structural images were also obtained (TR= 6200 ms  
170 and TE = 120 ms).

171

### 172 *Image preprocessing*

173 Except where stated, image processing followed procedures preregistered at  
174 <https://osf.io/ypmdj> and was conducted in SPM 12 (v7487) in MATLAB 2019b. The raw



175 fMRI time series were first checked to detect artefact volumes that were associated with high  
176 motion or were statistical outliers (e.g. due to scanner spikes). We checked head motion per  
177 run using an initial realignment step, classifying volumes as artefacts if their absolute motion  
178 was  $> 3$  mm or 3 deg, or between-scan relative motion  $> 2$  mm or 2 deg. Outlier scans were  
179 then defined as those with normalized mean or standard deviation (of absolute values or  
180 differences between scans)  $> 7$  SD from the mean for the run. Volumes identified as  
181 containing artefacts were replaced with the mean of the neighboring non-outlier volumes, or  
182 removed if at the end of a run. If more than half of the scans in a run had artefacts, that run  
183 was discarded. Artefacts were also modeled as confound regressors in the first level design  
184 matrices. Next, BOLD images acquired at different echo times were realigned and slice time  
185 corrected using SPM12 defaults. The resulting images were then resliced to the space of the  
186 first volume of the first echo-1 BOLD time series. A brain mask was computed based on  
187 preprocessed echo-1 BOLD images using Nilearn 0.5.2 and combined with a grey-and-white  
188 matter mask in functional space for better coverage of anterior and ventral temporal lobes  
189 (Abraham et al., 2014). The three echo time series were then fed into the Tedana workflow  
190 (Kundu et al., 2017), run inside the previously created brain mask. This workflow  
191 decomposed the time series into components and classified each component as BOLD signal  
192 or noise. The three echo series were optimally combined and noise components discarded  
193 from the data. The resulting time series were unwarped to correct for inhomogeneities in the  
194 scanner's magnetic field: the voxel displacement map calculated from the field maps was  
195 coregistered to the first echo-1 image from the first run, and applied to the combined time  
196 series for each run. The preprocessed BOLD time series corresponding to the optimal  
197 denoised combination of echoes outputted by the Tedana workflow were then used for RSA  
198 analysis, where we used unsmoothed functional images in native space to keep the finer-  
199 grained structure of activity. For univariate analysis, the preprocessed BOLD time series were

200 also spatially normalized to MNI space using SPM's non-linear registration tool, DARTEL;  
201 spatially normalized images were then smoothed with an 8 mm isotropic full-width half  
202 maximum Gaussian kernel.

203

#### 204 *Experimental design and statistical analysis*

##### 205 Sample size

206 The sample size was determined using effect sizes from two previous studies. Staresina et al.  
207 (2012) reported a large encoding-retrieval RSA similarity effect ( $d = 0.87$ ). However,  
208 subsequent memory effects are typically more subtle, for example  $d = 0.57$  for an activation  
209 measure (Morcom et al., 2003). We calculated that, with  $N = 28$ , we would have .8 power to  
210 detect  $d = 0.55$  for a one sample  $t$ -test at  $\alpha = 0.05$  (G\*Power 3.1.9.2).

211

##### 212 Behavioral analysis

213 To assess whether differences in task engagement during memory encoding predicted later  
214 memory, we modelled the effects of encoding task accuracy (0, 1) on subsequent memory  
215 outcomes using two separate generalized linear mixed effect models (GLMM) for studied  
216 items tested as old (subsequent hits and misses as predictors), and for studied items tested as  
217 lures (subsequent false alarms and correct rejection as predictors). Similarly, to assess any  
218 differences in study phase reaction times (RTs) according to subsequent memory status, we  
219 used two further linear mixed effect models (LMM). At test, to evaluate the effects on  
220 memory of perceptual and semantic similarity between objects, we also applied a generalized  
221 linear mixed model following the methods of Naspi et al. (2020). This had dependent  
222 measures of response at test (“old” or “new”) and confusability predictors calculated for each  
223 image and concept. C1 visual and color confusability were defined as the similarity value of  
224 an image with its most similar picture (i.e., the nearest neighbor) from Pearson correlation

225 and earth's mover distance metrics, respectively. Concept confusability was calculated by a  
226 weighted sum of the cosine similarities between objects in which each weight was the  
227 between-concept similarity itself, i.e., the sum of squared similarities (see Naspi et al.,  
228 (2020)). All the analyses described above were carried out data with the lme4 package  
229 (Version 1.1-23) in R (Version 4.0.0). Models included random intercepts to account for  
230 variation over items and participants.

231

## 232 Multivariate fMRI analysis

### 233 *Overview*

234 The goal of our study was to investigate how perceptual and semantic representations  
235 processed at encoding predict successful and unsuccessful mnemonic discrimination. To test  
236 this, we used RSA to assess whether the fit of perceptual and semantic representational  
237 models to activity patterns at encoding predicted subsequent memory. In two main sets of  
238 analyses we examined representations predicting later true recognition of studied items, and  
239 representations predicting false recognition of similar lures. We implemented a novel  
240 approach that models the interaction of representation similarity with subsequent memory in  
241 a single step. Each memory encoding model contrasts the strength of visual and semantic  
242 representations of items later remembered versus forgotten (or falsely recognized versus  
243 correctly rejected) within the same representational dissimilarity matrix (RDM). In a third set  
244 of analyses we also aimed to replicate Clarke and Tyler (2014) key findings regarding  
245 perceptual and semantic representations irrespective of memory. All RSA analyses were  
246 performed separately for each participant on trial-specific parameter estimates from a general  
247 linear model (GLM). We then followed three standard steps: 1) For each theoretical  
248 perceptual and semantic model, we created model RDMs embodying the predicted pairwise  
249 dissimilarity over items; 2) For each ROI (or searchlight sphere), we created fMRI data

250 RDMs embodying the actual dissimilarity of multivoxel activity patterns over items; 3) We  
251 determined the fits between the model RDMs and the fMRI data RDM for each ROI (or  
252 searchlight sphere). The implementation of these steps is outlined in the following sections.

253

#### 254 *RSA first level general linear model*

255 Statistical analysis of fMRI data was performed in SPM12 using the first-level GLM and a  
256 Least-Squares-All (LSA) method (Mumford et al., 2012). For each participant, the design  
257 matrix included one regressor for each trial of interest, for a total of 327 or 328 regressors  
258 (depending on counterbalancing), computed by convolving the 0.5 s duration stimulus  
259 function with a canonical hemodynamic response function (HRF). For each run, we also  
260 included twelve motion regressors comprising the three translations and three rotations  
261 estimated during spatial realignment, and their scan-to-scan differences, as well as individual  
262 scan regressors for any excluded scans, and session constants for each of the 4 scanner runs.  
263 The model was fit to native space pre-processed functional images using Variational Bayes  
264 estimation with an AR(3) autocorrelation model (Penny et al., 2005). A high-pass filter with a  
265 cutoff of 128 s was applied and data were scaled to a grand mean of 100 across all voxels and  
266 scans within sessions. Rather than using the default SPM whole-brain mask (which requires a  
267 voxel intensity of 0.8 of the global mean and can lead to exclusion of ventral anterior  
268 temporal lobe voxels), we set the implicit mask threshold to 0 and instead included only  
269 voxels which had at least a 0.2 probability of being in grey or white matter, as indicated by  
270 the tissue segmentation of the participant's T1 scan.

271

#### 272 *Regions of interest*

273 All regions of interests (ROIs) are shown in Figure 1. We defined six ROIs including areas  
274 spanning the ventral visual stream, which have been implicated in visual and semantic  
275 feature-based object recognition processes (Clarke and Tyler, 2014; Clarke and Tyler, 2015).

276 We also included the left inferior frontal gyrus, strongly implicated in semantic contributions  
277 to episodic encoding (Kim, 2011), and bilateral anterior ventral temporal cortex, which is  
278 implicated in semantic representation (Lambon Ralph et al., 2017) and is hypothesized to  
279 contribute to false memory encoding, albeit mainly in associative false memory tasks  
280 (Chadwick et al., 2016; Zhu et al., 2019). Except where explicitly stated, ROIs were bilateral  
281 and defined in MNI space using the Harvard-Oxford structural atlas: 1) the early visual cortex  
282 (EVC; BA17/18) ROI was defined using the Julich probabilistic cytoarchitectonic maps  
283 (Amunts et al., 2000) from the SPM Anatomy toolbox (Eickhoff et al., 2005); 2) the posterior  
284 ventral temporal cortex (pVTC) ROI consisted of the inferior temporal gyrus (occipito-  
285 temporal division; ITG), fusiform gyrus (FG), lingual gyrus (LG), and parahippocampal  
286 cortex (posterior division; PHC); 3) the perirhinal cortex (PrC) ROI was defined using the  
287 probabilistic perirhinal map including voxels with a  $> 10\%$  probability to be in that region  
288 (Devlin and Price, 2007; Holdstock et al., 2009); 4) the anterior ventral temporal cortex  
289 (aVTC) ROI included voxels with  $>30\%$  probability of being in the anterior division of the  
290 inferior temporal gyrus and  $>30\%$  probability of being in the anterior division of the fusiform  
291 gyrus; 5) the left inferior frontal gyrus (LIFG; BA44/45) consisted of the pars triangularis and  
292 pars opercularis. Lastly, we used univariate analysis as a preregistered method to define  
293 additional ROIs for RSA around any regions not already in the analysis that showed  
294 significant subsequent memory effects. Based on this analysis, we also included 6) the left  
295 inferior temporal gyrus (occipito-temporal division; LITG) as defined using the Harvard-  
296 Oxford atlas (see Results, Univariate fMRI analysis). The LITG has been previously  
297 implicated in true and false memory encoding (Dennis et al., 2007; Kim and Cabeza, 2007).  
298 The ROIs in Figure 1 are mapped on a pial representation of cortex using the Connectome  
299 Workbench (<https://www.humanconnectome.org/software/connectome-workbench>).

300

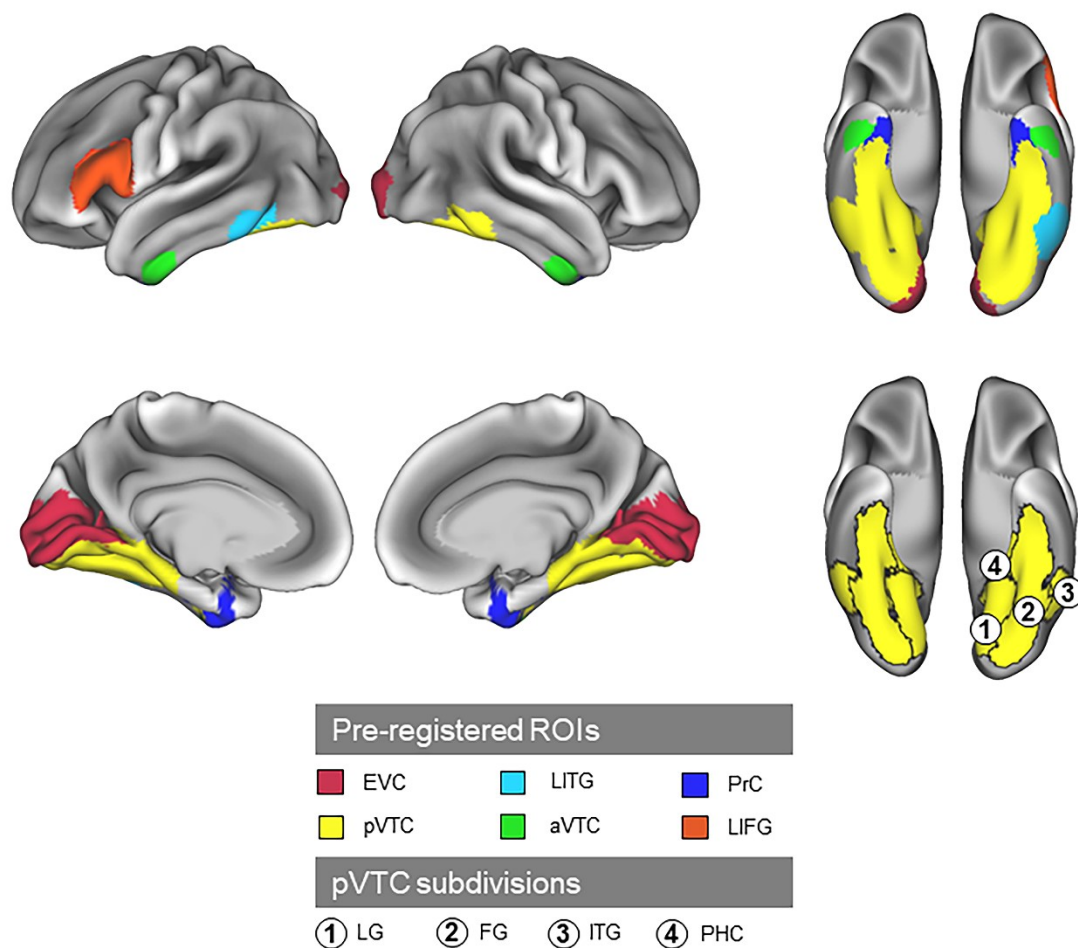

301

302 **Figure 1.** Binary ROIs overlaid on a pial cortical surface based on the normalized structural  
303 image averaged over participants. Colored ROIs represent regions known to be important in  
304 episodic encoding and in visual or semantic cognition. Circled numbers specify different  
305 subregions within pVTC (see Region of Interest for details).

306

307 *RSA region of interest analysis*

308 Model RDMs. We created four theoretical RDMs using low-level visual, color, binary-  
309 categorical, and specific object semantic feature measures. Figure 2 illustrates the  
310 multidimensional scale (MDS) plots for the perceptual and semantic relations expressed by  
311 these models, and Figure 3 shows the model RDMs. Memory encoding RDMs are displayed  
312 in Figure 3A and 3B, and overall RDMs irrespective of memory in Figure 3C.

313

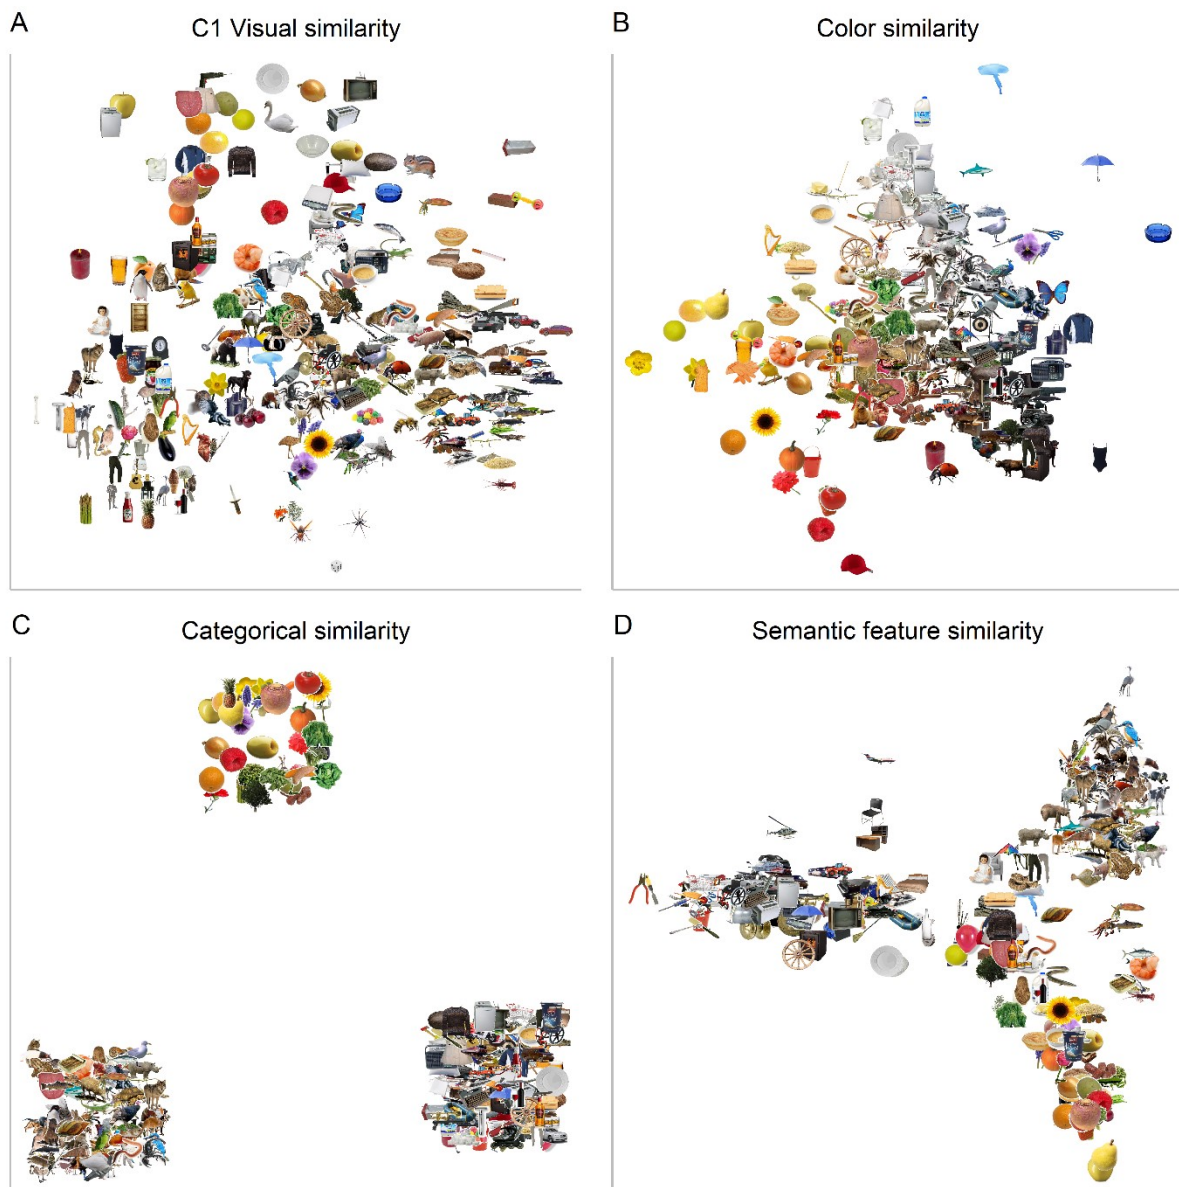

314

315 **Figure 2.** MDS plots for perceptual and semantic similarities for the four models. Pair-wise  
316 similarities were calculated to create representational dissimilarity matrices (RDMs). **A**, C1  
317 visual similarity codes for a combination of orientation and shape (e.g., round objects towards  
318 the top, horizontal shapes on the right, vertical shapes at the bottom). **B**, Color similarity  
319 represents color saturation and size information (i.e., from bright on the left to dark at the  
320 bottom, and white towards the top). **C**, Binary categorical semantic similarity codes for  
321 domain-level representations distinguishing animals, plants and nonbiological objects

322 (bottom-left, top, bottom-right, respectively). **D**, Semantic feature similarity codes for finer-  
323 grained distinctions based on features of each concept (e.g., differences within living things at  
324 the bottom, non-living things on the left, and many categories of animal on the top-right). The  
325 objects shown are taken from a single subject at encoding.

326

327 1) The *early visual RDM* was derived from the HMax computational model of vision  
328 (Riesenhuber and Poggio, 1999; Serre et al., 2007) and captured the low-level (V1) visual  
329 attributes of each picture in the C1 layer. Pairwise dissimilarity values were computed as 1 -  
330 Pearson's correlations between response vectors for gray-scale versions of each image.

331 2) The *color RDM* was calculated using the color distance package (Version 1.1.0; Weller  
332 and Westneat, 2019) in R. After converting the RGB channels into CIELab space we  
333 calculated the earth mover's distance between each pair of images (Rubner et al., 2000). We  
334 then normalized the distance so that the dissimilarity values ranged from 0 (lowest) to 1  
335 (highest).

336 3) The *animal-nonbiological-plant RDM* combined the 24 object categories together  
337 according to 3 domains: animal, nonbiological, and plants (Clarke and Tyler, 2014). Pairwise  
338 dissimilarity values in this RDM were either 0 (same domain) or 1 (different domain).

339 4) Construction of the *semantic feature RDM* followed Clarke and Tyler (2014), but used  
340 updated property norms (Devereux et al., 2014). We first computed pairwise feature  
341 similarity between concepts from a semantic feature matrix in which each concept is  
342 represented by a binary vector indicating whether a given feature is associated with the  
343 concept or not. Pairwise dissimilarity between concepts was computed as  $1 - S$  where  $S$  is  
344 equal to the cosine angle between feature vectors. This RDM captures both categorical  
345 similarity between objects (as objects from similar categories have similar features) and  
346 within-category object individuation (as objects are composed of a unique set of features).



347 For the analyses of memory encoding, model RDMs were split into two, giving one RDM for  
348 each subsequent memory analysis. The true subsequent memory RDMs included only items  
349 that were subsequently tested as old; these were coded as subsequent hits or subsequent  
350 misses (Fig. 3A). The false subsequent memory RDMs included only items that were  
351 subsequently tested as lures; these were coded as subsequent false alarms or subsequent  
352 correct rejections (Fig. 3B). For true subsequent memory, we computed dissimilarity between  
353 all pairs of subsequently remembered items, and all pairs of subsequently forgotten items,  
354 omitting pairings of subsequently remembered and subsequently forgotten items. Then, to  
355 assess how dissimilarity depended on subsequent memory we weighted the model RDMs so  
356 that the sum of the cells corresponding to remembered items equaled 1 and the sum of the  
357 cells corresponding to forgotten items equaled -1, so the dissimilarity values for all included  
358 trials summed to 0 (i.e., subsequent hits – subsequent misses). Thus, positive correlations of  
359 the model RDMs with the fMRI data RDMs indicate that the representations are aligned more  
360 strongly with neural patterns for items that are later remembered than forgotten. Conversely,  
361 negative correlations indicate greater alignment for items that are later forgotten than  
362 remembered items. For false subsequent memory, we followed the same procedure, but  
363 subsequent false alarms were substituted for subsequent hits, and subsequent correct  
364 rejections for subsequent misses. Analyses were implemented using custom MATLAB 2019b  
365 (The MathWorks Inc., 2019) and R (Version 4.0.0; R Core Team, 2017) functions  
366 (<https://osf.io/ypmdj>). For the RSA analyses irrespective of memory, we modeled  
367 dissimilarities between all item pairs, treating all trials in the same way (see Fig. 3C).  
368

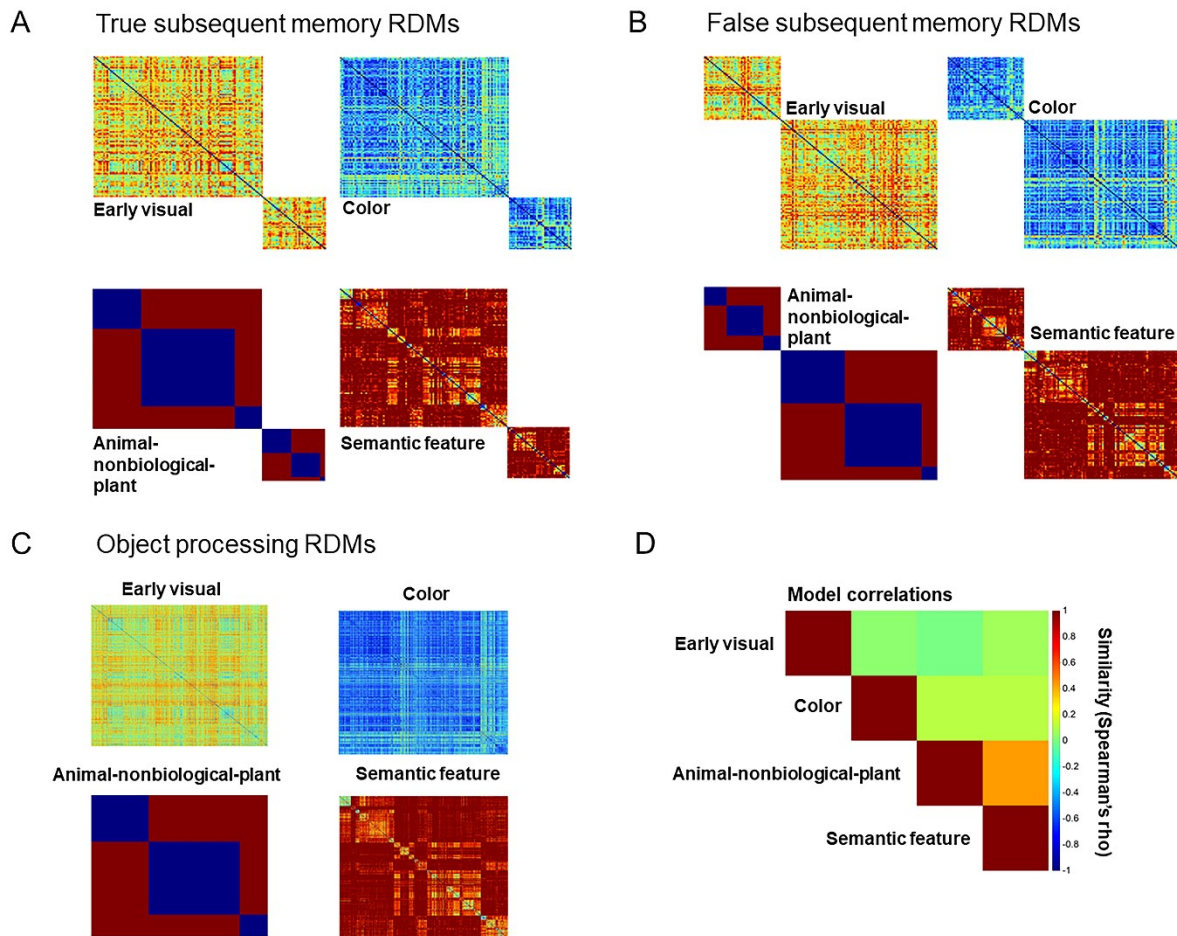

369

370 **Figure 3.** Representational dissimilarity matrices. **A**, Dissimilarity predictions of the four true  
371 subsequent memory models which included items that were later tested as old, coding  
372 subsequent hits positively (upper-left quadrants) and subsequent misses negatively (bottom-  
373 right quadrants). **B**, Dissimilarity predictions of the four false subsequent memory models  
374 which included items that were later tested as lures, coding subsequent false alarms positively  
375 (upper-left quadrants) and subsequent correct rejections negatively (bottom-right quadrants).  
376 **C**, Dissimilarity models of object processing including all the items. **D**, Similarity between  
377 theoretical models. The specific models are unique for each participant. For visualization  
378 purposes, similarity values within true and false subsequent memory RDMs have not been  
379 scaled.

380

381

382 *fMRI data RDMs*. Parameter estimates were extracted from gray matter voxels in each ROI  
383 for all trials of interest. For each voxel, these betas were then normalized by dividing them by  
384 the standard deviation of its residuals (Walther et al., 2016). As for the model RDMs, we  
385 constructed separate fMRI data RDMs for the true and false subsequent memory and overall  
386 object processing analyses. For the true subsequent memory analysis, the fMRI data RDM  
387 represented activity patterns for concepts subsequently tested as old, and for the false  
388 subsequent memory analysis, the fMRI data RDM represented activity patterns for concepts  
389 subsequently tested as lures. For the overall analysis, the RDM represented activity patterns  
390 for all study trials. For the fMRI data RDMs for the subsequent memory analysis, as for the  
391 model RDMs, we computed dissimilarity between all pairings of subsequently remembered  
392 (or falsely recognized) items, and between all pairings of subsequently forgotten (or correctly  
393 rejected) items, omitting pairings between different trial types. Distance between each item  
394 pair was computed as  $1 - \text{Pearson's correlation}$ , creating a dissimilarity matrix.  
395

396 *Fitting model to data RDMs.* Each fMRI data RDM was compared with each theoretical  
397 model RDM using Spearman's rank correlation, and the resulting dissimilarity values were  
398 Fisher-transformed. For the subsequent memory analysis, we tested for significant positive  
399 and negative similarities between model RDM and fMRI data RDMs at the group level using  
400 a two-sided Fisher's one-sample randomization (10,000 permutation) test for location with a  
401 Bonferroni correction over 6 ROIs. The permutation distribution of the test statistic  $T$   
402 enumerates all the possible ways of permuting the correlation signs, positive or negative, of  
403 the observed values and computes the resulting sum. Thus, for a two-sided hypothesis, the  $p$ -  
404 value is computed from the permutation distribution of the absolute value of  $T$ , calculating  
405 the proportion of values in this permutation distribution that are greater or equal to the  
406 observed value of  $T$  (Millard and Neerchal, 2001). For the overall analysis we only tested for  
407 significant positive similarities between model RDM and fMRI data RDMs (Clarke and  
408 Tyler, 2014), using a one-sided test, in which the  $p$ -value is evaluated as the proportion of  
409 sums in the permutation distribution that are greater than or equal to the observed sum  $T$   
410 (Millard and Neerchal, 2001). To find the unique effect of model RDMs, each fMRI data  
411 RDM showing a significant effect was also compared with each theoretical model RDM  
412 while controlling for effects of all other significant model RDMs (using partial Spearman's  
413 rank correlations).

414

#### 415 *RSA searchlight analysis*

416 In addition to the targeted ROI analysis, we ran a whole-brain searchlight analysis. This  
417 followed the same 3 main steps as the ROI analysis (see RSA region of interest analysis). For  
418 each voxel, the fMRI data RDM was computed from parameter estimates for gray matter  
419 voxels within a spherical searchlight of radius 7 mm, corresponding to maximum dimensions  
420  $5 \times 5 \times 5$  voxels. Dissimilarity was again estimated using  $1 - \text{Pearson's correlation}$ . As in the

421 ROI analysis, this fMRI data RDM was compared with the model RDMs, and the resulting  
422 dissimilarity values were Fisher transformed and mapped back to the voxel at the center of  
423 the searchlight. The similarity map for each model RDM and participant was then normalized  
424 to the MNI template space (see Image preprocessing). For each model RDM, the similarity  
425 maps were entered into a group-level random-effects analysis and thresholded using  
426 permutation-based statistical nonparametric mapping (SnPM;  
427 <http://www.nisox.org/Software/SnPM13/>). This corrected for multiple comparisons across  
428 voxels and the number of theoretical model RDMs. As for the ROIs we performed two-tailed  
429 tests in the subsequent memory analyses and one-tailed tests for the overall analysis.  
430 Variance smoothing of 6 mm FWHM and 10,000 permutations were used in all analyses. We  
431 used cluster-level inferences with FWE-correction at  $\alpha = 0.025$  in each direction for the two-  
432 tailed tests and  $\alpha = 0.05$  for the one-tailed test, in both cases with a cluster forming threshold  
433 of 0.005 uncorrected. All results are presented on an inflated representation of the cortex  
434 using the BrainNet Viewer (Xia et al., 2013, <http://www.nitrc.org/projects/bnv/>) based on a  
435 standard ICBM152 template.

436

#### 437 Univariate fMRI analysis

438 In addition to RSA, we used univariate analysis to test whether activation in PrC was related  
439 to the conceptual confusability of an object, in a replication of Clarke and Tyler (2014), and  
440 whether this activation predicted memory. We also used activations to define additional ROIs  
441 (see Regions of interest). The first level GLM for each participant included one regressor of  
442 interest for each of the 4 experimental conditions (subsequent hits, misses, false alarms, and  
443 correct rejections). For each condition, we also included 4 linear parametric modulator  
444 regressors representing concept confusability values for each concept with other concepts in  
445 the CSLB property norms (Devereux et al., 2014). We first computed a semantic similarity

446 score between each pair of concepts (see RSA region of interest analysis, Model RDMs). The  
447 concept confusability score of each concept was then equal to the sum of squared similarities  
448 between it and the other concepts in the set. This was equivalent to a weighted sum of pair-  
449 wise similarities in which each weight was the between-concept similarity itself, a measure  
450 used in our recent behavioral study (Naspi et al., 2020). As also specified in the  
451 preregistration, since the results of the concept confusability analysis diverged from those of  
452 Clarke and Tyler (2014), we ran an additional analysis using a measure of concept  
453 confusability with a stronger weighting scheme equivalent to theirs. They defined concept  
454 confusability as the exponential of the ranked similarities of all the paired concepts, which is  
455 very close to a nearest neighbor scheme in which each concept's similarity is equal to its  
456 similarity to the most similar concept in the set. Due to our larger number of items the  
457 exponential weighting produced extremely large weights, so we substituted the simpler  
458 nearest neighbor scheme (the two measures were correlated at  $r = 0.98$ ). We used an explicit  
459 mask including only voxels which had at least a 0.2 probability of being in grey matter as  
460 defined using the MNI template. To permit inferences about encoding condition effects  
461 across participants, contrast images were submitted to a second-level group analysis (one  
462 sample  $t$ -test) to obtain  $t$ -statistic maps. The maps were thresholded at  $p < 0.05$ , FWE-  
463 corrected for multiple comparisons at the voxel level using SPM (the preregistration specified  
464 3dClustSim in AFNI, but this function had since been updated (Cox et al., 2017) so for  
465 simplicity we used the SPM default). Only regions whose activations involved contiguous  
466 clusters of at least 5 voxels were retained as ROIs for subsequent RSA analysis.

467

468 *Code accessibility*

469 All analyses were performed using custom code and implemented either in MATLAB or R.

470 All code and the data for the behavioral and the fMRI analyses are available through

471 <https://osf.io/z4c62/>.

472 **Results**

473 *Memory task performance*

474 In the study phase, participants correctly identified most of the time whether concepts began  
475 with a consonant or vowel on the incidental encoding task (M proportion = 0.78). Analysis on  
476 task engagement (see Materials and Methods, Behavioral data) using a GLMM showed that  
477 accuracy at encoding did not differ according to whether items that were tested as studied  
478 were later remembered relative to forgotten ( $\beta = 0.110$ , SEM = 0.242,  $z = 0.456$ ,  $p = 0.649$ ),  
479 or whether items that were tested as lures were later falsely recognized relative to correctly  
480 rejected ( $\beta = 0.051$ , SEM = 0.202,  $z = 0.251$ ,  $p = 0.802$ ). Similarly, a linear mixed model did  
481 not reveal any difference in RTs related to subsequent old items that were later remembered  
482 relative to forgotten ( $\beta = 0.002$ , SEM = 0.017,  $t = 0.123$ ,  $p = 0.902$ ), or subsequent lures that  
483 were later falsely recognized relative to correctly rejected ( $\beta = -0.013$ , SEM = 0.015,  $t = -$   
484  $0.873$ ,  $p = 0.383$ ). Thus, the fMRI subsequent memory effects are not attributable to  
485 differences in accuracy or time on task at encoding.

486

487 At test, as a simple check on the overall level of performance we used the discrimination  
488 index  $Pr$ , i.e., the difference between the probability of a hit to studied items and the  
489 probability of a false alarm to novel items. All participants passed the preregistered inclusion  
490 criterion of  $Pr > 0.1$ . Overall, discrimination collapsed across confidence was very good (M =  
491 0.649, SD = 0.131,  $t_{(27)} = 26.259$ ,  $p < 0.001$ ). Discrimination was also above chance for high

492 confidence ( $M = 0.771$ ,  $SD = 0.152$ ,  $t_{(27)} = 26.868$ ,  $p < 0.001$ ) and low confidence judgments  
493 ( $M = 0.330$ ,  $SD = 0.145$ ,  $t_{(27)} = 12.014$ ,  $p < 0.001$ ). This suggests that low confidence  
494 responses at test carried veridical memory, so we followed our preregistered plan to include  
495 trials attracting both high and low confidence responses in the subsequent memory analysis.  
496 Following an analogous procedure for false recognition of similar lures corrected by  
497 subtracting the proportion of false alarms to novel items, we also found that this was  
498 significantly above chance for judgments collapsed across confidence ( $M = 0.271$ ,  $SD =$   
499  $0.090$ ,  $t_{(27)} = 15.996$ ,  $p < 0.001$ ), and for both high confidence ( $M = 0.293$ ,  $SD = 0.133$ ,  $t_{(27)} =$   
500  $11.618$ ,  $p < 0.001$ ) and low confidence ( $M = 0.157$ ,  $SD = 0.160$ ,  $t_{(27)} = 5.187$ ,  $p < 0.001$ )  
501 considered separately.

502

503 We then used a GLMM to quantify the influence of perceptual and semantic variables on  
504 memory performance according to item status. Our variables of interest were condition  
505 (studied, lure, or novel), concept confusability, C1 visual confusability, and color  
506 confusability (see Behavioral data for details). Results revealed modulations of memory by  
507 perceptual and semantic variables in line with our recent behavioral study (Naspi et al.,  
508 2020). People were less likely to recognize studied items for which the low-level visual  
509 representations (C1) were more similar to those of their nearest neighbor ( $\beta = -0.166$ ,  $SEM =$   
510  $0.064$ ,  $z = -2.584$ ,  $p = 0.015$ ), and also less likely to recognize studied items with high  
511 concept confusability relative to novel items ( $\beta = -0.533$ ,  $SEM = 0.067$ ,  $z = -7.963$ ,  $p <$   
512  $0.001$ ). As expected, concept confusability also had a substantial effect on false recognition  
513 of similar lures relative to novel items, whereby images whose concepts were more confusable  
514 with other concepts in the set were less likely to be falsely recognized ( $\beta = -0.273$ ,  $SEM =$   
515  $0.064$ ,  $z = -4.292$ ,  $p < 0.001$ ).

516



517 *Preregistered RSA analysis in regions of interest*

518 Perceptual and semantic representations predict true recognition

519 To examine representations engaged during successful encoding we compared the fit of early  
520 visual, color, animal-nonbiological-plant, and semantic feature models for studied items  
521 tested as old that were subsequently remembered (number of trials,  $M = 61.41$ ; range = 60-  
522 146) versus forgotten (number of trials,  $M = 19.93$ ; range = 17-104) (Fig. 4A). These  
523 comparisons were bidirectional, since engagement of perceptual and/or semantic processing  
524 in a region might either support or be detrimental to later memory. Thus, we used a two-sided  
525 Fisher's randomization test  $T$ . In posterior ROIs, engagement of both perceptual and finer-  
526 grained semantic representations tended to predict successful later recognition. In EVC, the  
527 early visual model strongly predicted later true recognition of studied items ( $M = 0.07$ , 95%  
528 CI [0.05, 0.09],  $T = 1.86$ ,  $p < 0.001$ ). Thus, when the neural patterns at study were  
529 representing visual information, items were more likely to be correctly recognized. Both the  
530 early visual and semantic feature models also predicted true recognition in pVTC ( $M = 0.03$ ,  
531 95% CI [0.02, 0.04],  $T = 0.82$ ,  $p < 0.001$ , and  $M = 0.02$ , 95% [CI: 0.01, 0.04],  $T = 0.67$ ,  $p =$   
532 0.007, respectively). In contrast, taxonomic semantic representations coded more anteriorly  
533 were associated with later forgetting. In aVTC and in the LIFG, model fit for categorical  
534 semantic information represented by the animal-nonbiological-plant domain was less for  
535 remembered than forgotten studied items ( $M = -0.01$ , 95% CI [-0.02, -0.01],  $T = 0.35$ ,  $p =$   
536 0.001, and  $M = -0.02$ , 95% CI [-0.04, -0.01],  $T = 0.65$ ,  $p = 0.004$ , respectively). Thus, when  
537 neural patterns in these regions were aligned with items' taxonomic categories, participants  
538 were less likely to successfully recognize them. No other results were significant.

539

540 We also checked which representations showed unique effects that predicted memory after  
541 controlling for effects of other significant models using partial correlation. In pVTC, only the

542 early visual model uniquely predicted successful recognition memory for studied items ( $M =$   
 543  $0.02$ ,  $95\%$  CI [ $0.01$ ,  $0.03$ ],  $T = 0.64$ ,  $p = 0.004$ ) (but see Exploratory ROI analysis).

544

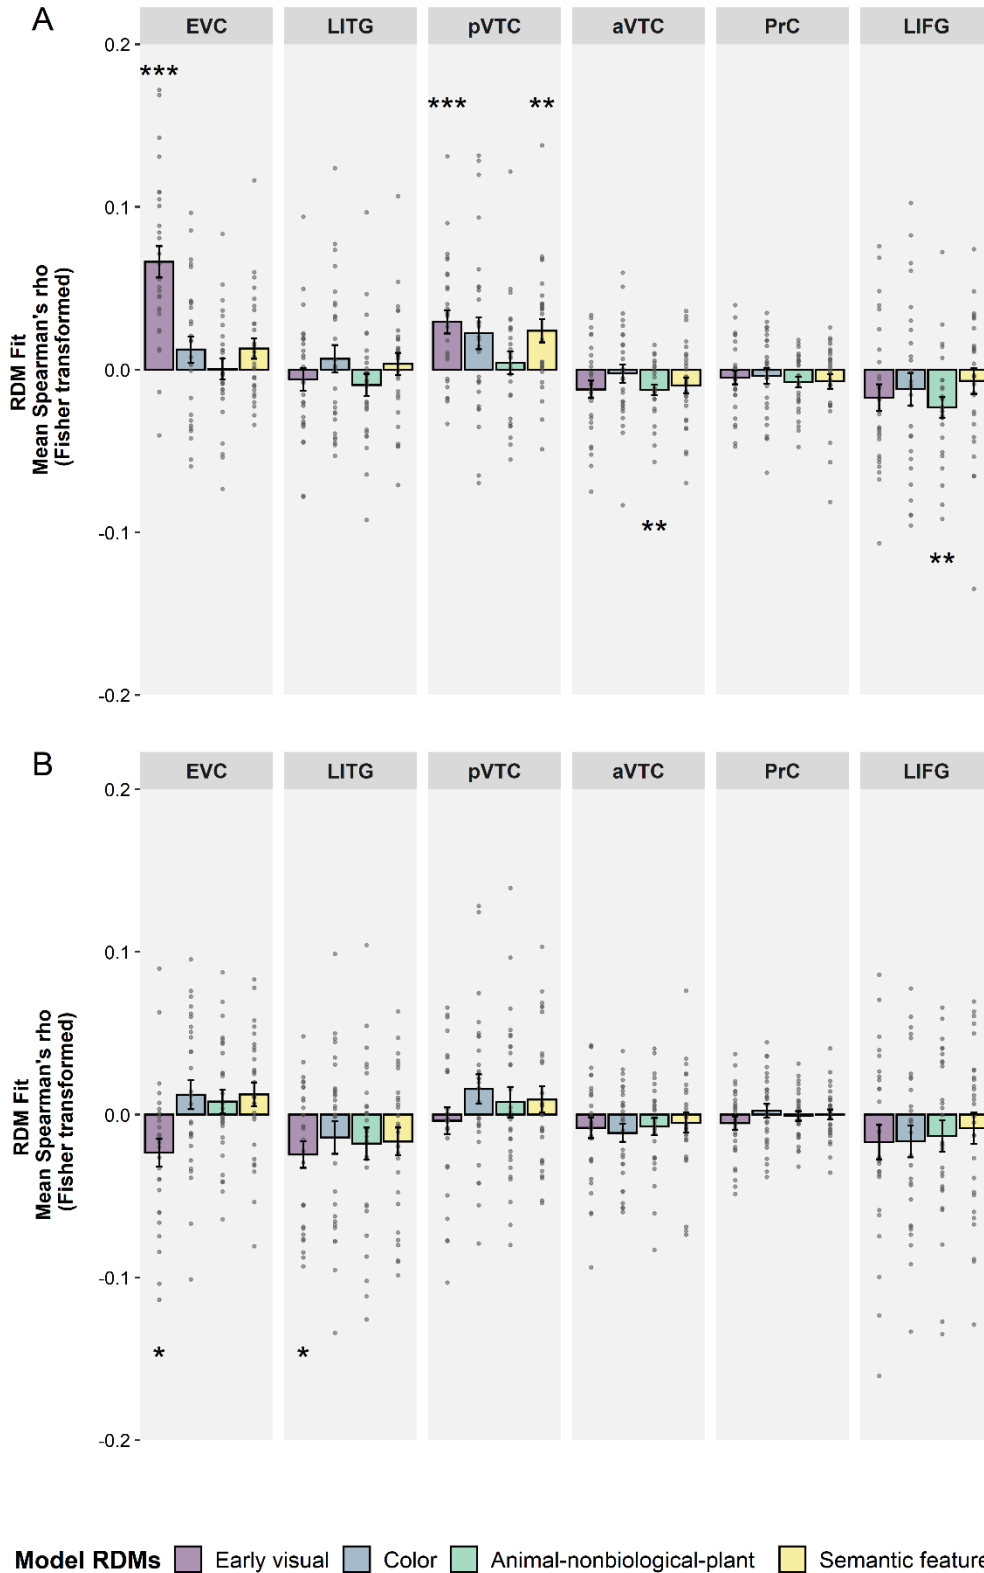

545

546 **Figure 4.** Perceptual and semantic representations predicting subsequent memory for *a priori*  
547 ROIs and models. Plots show the group mean Fisher-transformed Spearman correlation  
548 coefficient reflecting perceptual and semantic representations associated with: **A**, true  
549 subsequent memory; **B**, false subsequent memory. Error bars represent the standard error of  
550 the mean (SEM) across participants. Asterisks indicate models for which Spearman's rho  
551 differed significantly from zero at the group level (two-sided Fisher's randomization test for  
552 location; Bonferroni correction calculated multiplying the uncorrected  $p$ -value by the number  
553 of comparisons made). \*  $p < 0.05$ , \*\*  $p < 0.01$ , \*\*\*  $p < 0.001$

554

555 Weak perceptual representations predict false recognition

556 To examine how the perceptual and semantic representations embodied in our theoretical  
557 models contributed to subsequent memory for lures, we compared RSA model fit for items  
558 that were later falsely recognized (number of trials,  $M = 30.71$ ; range = 26-107) versus  
559 correctly rejected (number of trials,  $M = 50.61$ ; range = 54-131) (Figure 4B). In posterior  
560 regions, weaker low-level visual representations of pictures predicted subsequent false  
561 recognition of lures. We observed this pattern in both the EVC and the LITG ( $M = -0.02$ ,  
562 95% CI [-0.04, -0.01],  $T = 0.66$ ,  $p = 0.047$ , and  $M = -0.02$ , 95% CI [-0.04, -0.01],  $T = 0.69$ ,  $p$   
563 = 0.026, respectively). Thus, when neural patterns in these regions were not aligned with the  
564 early visual model, items were more likely to be falsely recognized. No other results were  
565 significant.

566

567 Perceptual and semantic object processing irrespective of memory

568 Replicating Clarke and Tyler (2014), we also examined the perceptual and semantic  
569 representations of objects that were reflected in fMRI activity patterns regardless of memory  
570 encoding. The results (Fig. 5) showed that while visual information is broadly represented

571 posteriorly, activity patterns in the aVTC, PrC, and LIFG reflect finer-grained semantic  
572 information. Posteriorly, EVC showed a strong relationship with the low-level visual model  
573 ( $M = 0.08$ , 95% CI [0.06, 0.10],  $T = 2.21$ ,  $p < 0.001$ ), and a weaker but significant relation  
574 with the semantic feature model ( $M = 0.01$ , 95% CI [0.00, 0.01],  $T = 0.20$ ,  $p = 0.032$ ). More  
575 anteriorly, the low-level visual and semantic feature models were both significantly related to  
576 activity patterns in pVTC ( $M = 0.04$ , 95% CI [0.03, 0.04],  $T = 1.00$ ,  $p < 0.001$ , and  $M = 0.02$ ,  
577 95% CI [0.02, 0.03],  $T = 0.60$ ,  $p < 0.001$ , respectively) and in LITG ( $M = 0.01$ , 95% CI [0.00,  
578 0.02],  $T = 0.26$ ,  $p < 0.038$ , and  $M = 0.02$ , 95% CI [0.01, 0.02],  $T = 0.45$ ,  $p < 0.001$ ,  
579 respectively). At the apex of the ventral visual pathway, semantic feature information was  
580 coded in both the bilateral aVTC ( $M = 0.01$ , 95% CI [0.00, 0.01],  $T = 0.17$ ,  $p = 0.006$ ) and in  
581 bilateral PrC ( $M = 0.01$ , 95% CI [0.00, 0.01],  $T = 0.19$ ,  $p < 0.001$ ). These findings replicated  
582 those of Clarke and Tyler (2014). The specific semantic properties of objects were also  
583 represented in the LIFG ( $M = 0.01$ , 95% CI [0.01, 0.02],  $T = 0.30$ ,  $p = 0.001$ ).  
584

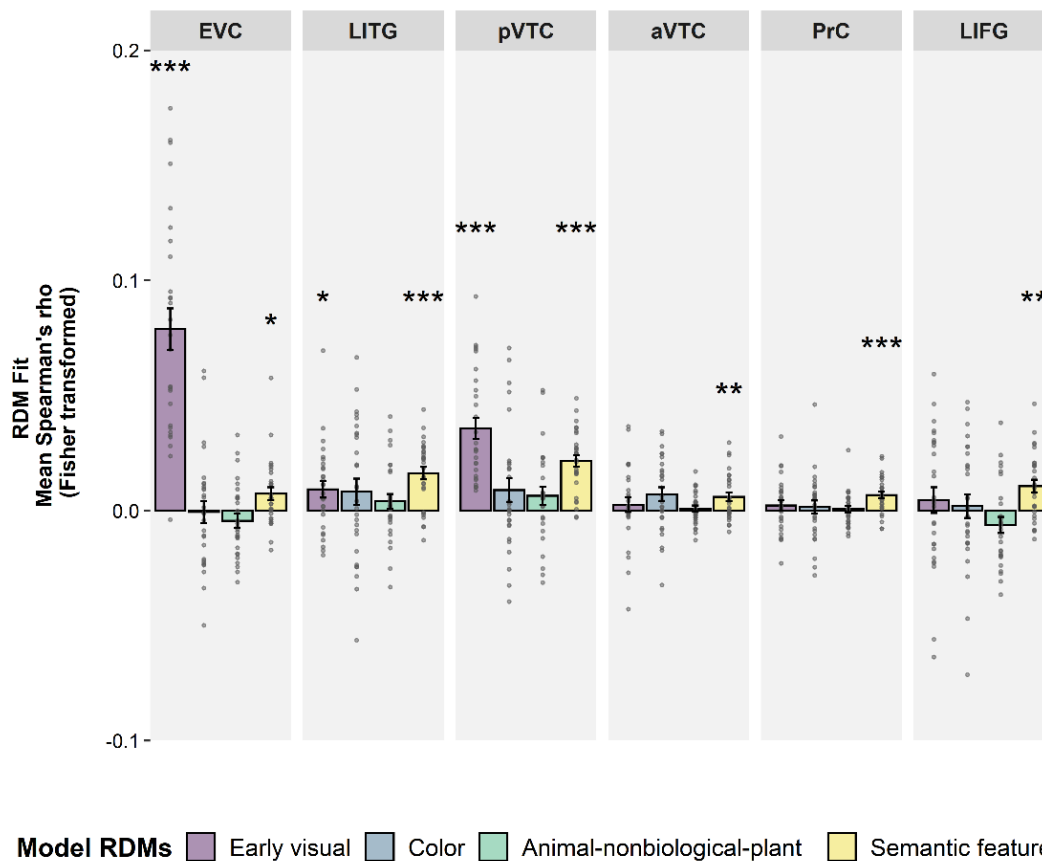

585

**Model RDMs** ■ Early visual ■ Color ■ Animal-nonbiological-plant ■ Semantic feature

586

**Figure 5.** Semantic and perceptual representations represented in ROIs regardless of memory

587

encoding. Region of Interest (ROI) results comparing four model RDMs to patterns of

588

activity along the ventral stream and frontal regions. Error-bars are standard error of the mean

589

(SEM) across subjects. Asterisks above and below the bars depict *p*-values for tests of

590

whether each individual Spearman's correlation is greater than zero (one-sided Fisher's

591

randomization test for location; Bonferroni correction calculated multiplying the uncorrected

592

*p*-value by the number of comparisons made). \* *p* < 0.05, \*\* *p* < 0.01, \*\*\* *p* < 0.001

593

594

We then ran a partial correlation on those ROIs showing significant effects for different

595

models. As expected, patterns of activity in the EVC were uniquely related to the early visual

596

model (M = 0.08, 95% CI [0.06, 0.10], *T* = 2.20, *p* < 0.001), replicating Clarke and Tyler's

597

(2014) results. Thus, the semantic feature model was no longer significant when the early

598

visual model was controlled for. More anteriorly, both low-level visual and semantic feature

599 information were uniquely related to the pattern of activity in the pVTC ( $M = 0.03$ , 95% CI  
600 [0.03, 0.04],  $T = 0.96$ ,  $p < 0.001$ , and  $M = 0.02$ , 95% CI [0.01, 0.02],  $T = 0.54$ ,  $p < 0.001$ ,  
601 respectively). However, after controlling for the low-level visual model, activity patterns in  
602 the LITG were only uniquely associated with semantic feature representations ( $M = 0.02$ ,  
603 95% CI [0.01, 0.02],  $T = 0.44$ ,  $p < 0.001$ ). Thus, like Clarke and Tyler (2014), we found that  
604 visual information is represented in early visual regions. We also replicated their finding that  
605 semantic feature similarity information was coded more anteriorly in the PrC, and found  
606 further, also anterior, regions that showed a similar pattern, in the aVTC and the LIFG (see  
607 also RSA searchlight fMRI analysis).

608

#### 609 *Exploratory RSA analysis in regions of interest*

610 Perceptual and semantic representations in pVTC subdivisions predict true recognition  
611 In the preregistered analyses reported above, our large pVTC ROI showed evidence of both  
612 visual and semantic feature representations predicting memory success. We therefore  
613 explored whether four subdivisions of this large bilateral region showed distinct effects: the  
614 LG, ITG, FG, and PHC (see Regions of interest). Moreover, given our strong *a priori*  
615 prediction of involvement of PrC in subsequent memory, we ran exploratory analyses in left  
616 and right PrC separately. The results are shown below in Figure 6. Posteriorly, in bilateral  
617 LG, perceptual information related to the early visual model predicted later recognition of  
618 studied items ( $M = 0.03$ , 95% CI [0.01, 0.04],  $T = 0.74$ ,  $p = 0.002$ ), as it did in the EVC ROI.  
619 In contrast, more anteriorly, activity patterns in the FG related to both the low-level visual  
620 and semantic feature models predicted subsequent true recognition ( $M = 0.03$ , 95% CI [0.02,  
621 0.05],  $T = 0.87$ ,  $p = 0.002$ , and  $M = 0.04$ , 95% CI [0.02, 0.05],  $T = 1.01$ ,  $p < 0.001$ ,  
622 respectively), as did categorical semantic information represented by the animal-  
623 nonbiological-plants model in the PHC ( $M = 0.02$ , 95% CI [0.01, 0.03],  $T = 0.55$ ,  $p = 0.019$ ).

624 Lastly, activity related to the categorical semantic model in the left PrC predicted subsequent  
625 forgetting ( $M = -0.01$ , 95% CI  $[-0.02, 0.00]$ ,  $T = 0.28$ ,  $p = 0.023$ ).

626

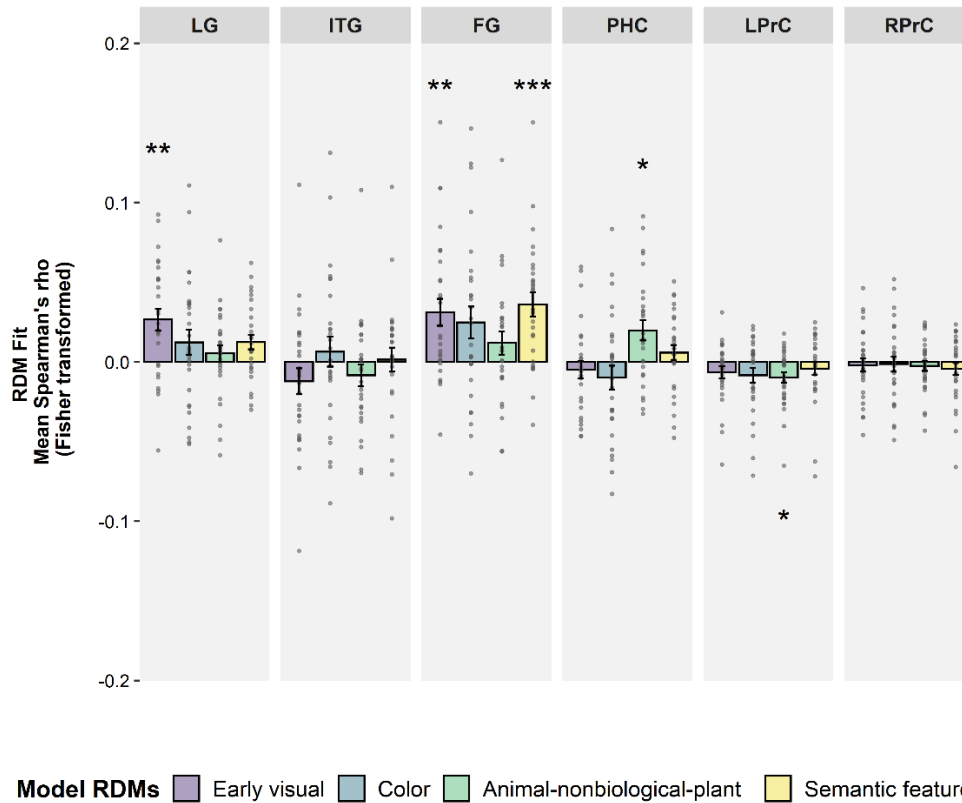

627

628 **Figure 6.** Perceptual and semantic representations predicting true subsequent memory in  
629 exploratory ROIs. Plots show the group mean Fisher-transformed Spearman correlation  
630 coefficient reflecting perceptual and semantic representations associated with true subsequent  
631 memory. Error bars represent the standard error of the mean (SEM) across participants.  
632 Asterisks indicate significance of tests of group level differences of Spearman's rho from  
633 zero (two-sided Fisher's randomization test for location; Bonferroni correction calculated  
634 multiplying the uncorrected  $p$ -value by the number of comparisons made). \*  $p < 0.05$ , \*\*  $p <$   
635  $0.01$ , \*\*\*  $p < 0.001$

636

637 A partial correlation analysis for the FG (which showed effects of multiple models)  
638 confirmed that both the early visual and semantic feature models were uniquely associated

639 with later true recognition ( $M = 0.02$ , 95% CI [0.01, 0.03],  $T = 0.58$ ,  $p = 0.034$ , and  $M = 0.03$ ,  
640 95% CI [0.01, 0.04],  $T = 0.71$ ,  $p = 0.002$ , respectively). Thus, both simple visual and object-  
641 specific semantic information contributed to memory after controlling for each other.

642

643 Lastly, following our main analyses of true and false memory encoding, we wanted to check  
644 for evidence that some of the key results differed according to encoding type. Thus, we  
645 compared the fit of our theoretical models for studied items tested as old that were  
646 subsequently remembered versus lures that were subsequently falsely recognized. Results  
647 showed that low-level visual information mapped in EVC was stronger for items that were  
648 subsequently remembered than falsely recognized ( $M = 0.04$ , 95% CI [0.02, 0.06],  $T = 1.16$ ,  
649  $p < 0.001$ ). No other results were significant at the Bonferroni-corrected threshold, but  
650 without a correction the theoretically important object-specific semantic representations in  
651 FG were also stronger for true than false recognition ( $M = 0.02$ , 95% CI [0.00, 0.04],  $T =$   
652  $0.61$ ,  $p = 0.030$ ).

653

#### 654 *Preregistered RSA searchlight analysis*

655 Perceptual and semantic representations associated with memory encoding

656 The RSA searchlight analysis tested for any further brain regions coding for perceptual and  
657 semantic information associated with memory encoding (Figure 7 and Table 1). The true  
658 subsequent memory models showed significant fit to activity patterns in several areas beyond  
659 the *a priori* ROIs. The color similarity model was related to patterns in the right parietal  
660 opercular cortex, superior frontal gyrus, and precentral gyrus, and this representation at  
661 encoding predicted later successful recognition of studied items. Fine-grained semantic  
662 features represented in the right lateral occipital cortex (LOC) also predicted true recognition.  
663 Coarse categorical semantic representations in right inferior frontal gyrus (RIFG);



664 BA44/45/47) and frontal pole (FP) were associated with later forgetting, paralleling the  
665 findings for the *a priori* ROI in LIFG (BA44/45).

### True subsequent memory

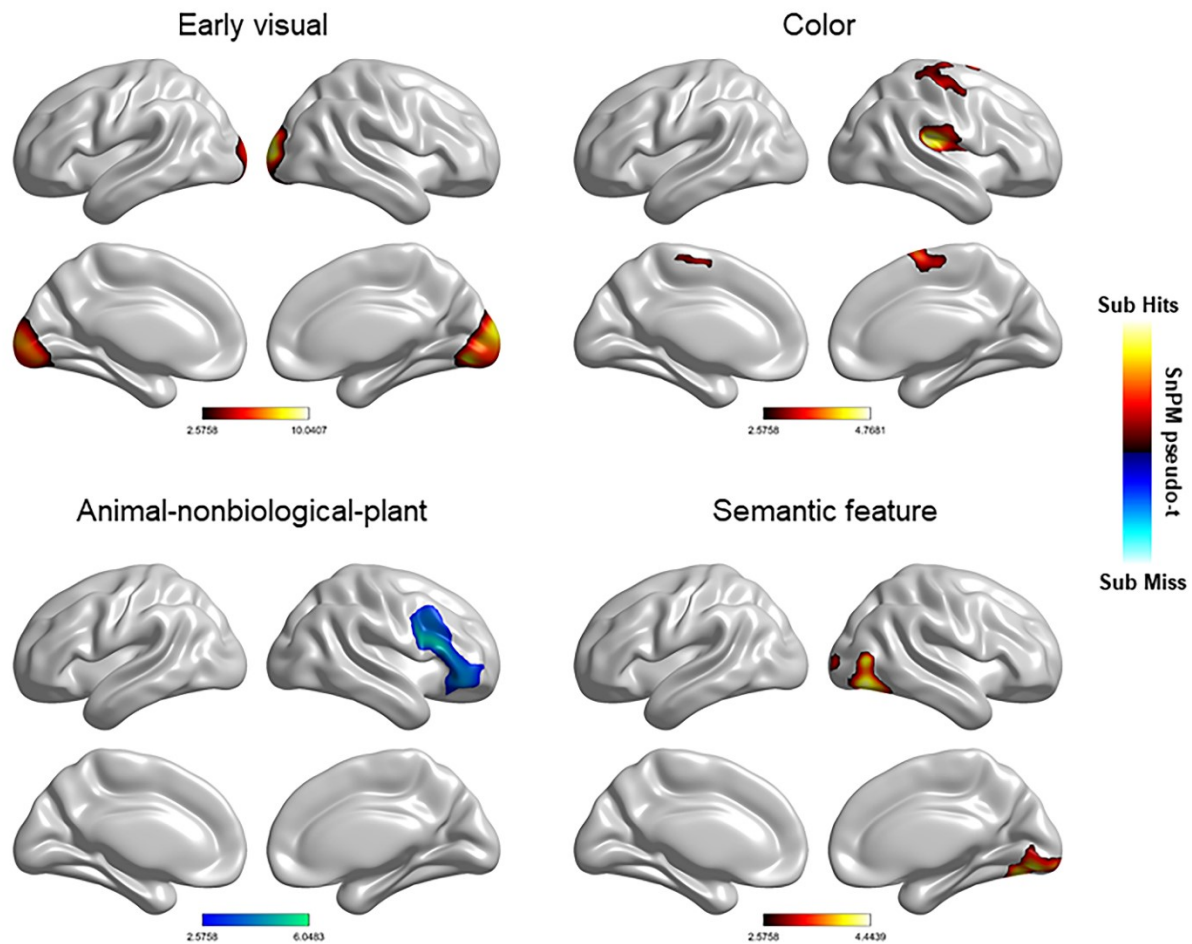

666

667 **Figure 7.** RSA searchlight results for perceptual and semantic models. The figure shows  
668 regions in which multivoxel activity pattern predicted successful subsequent true recognition  
669 (hot map) and unsuccessful true recognition (i.e., subsequent forgetting, cool map). All  
670 significant clusters are shown at the FWE-corrected threshold used for analysis (see Materials  
671 and Methods: RSA searchlight analysis). No suprathreshold voxels survived for the subsequent  
672 false recognition models. Similarity maps are presented on an inflated representation of the  
673 cortex based on the normalized structural image averaged over participants.

674

675

676 **Table 1. RSA searchlight results showing perceptual and semantic effects on successful**

677 **true memory encoding**

| Regions                         | Cluster extent | Cluster-level $p$ (FWE) | Pseudo- $t$ | x   | y   | z   |
|---------------------------------|----------------|-------------------------|-------------|-----|-----|-----|
| Early visual                    |                |                         |             |     |     |     |
| R occipital pole                | 2493           | 0.005                   | 10.04       | 18  | -93 | 9   |
| R lingual gyrus                 |                |                         | 8.91        | 15  | -78 | -6  |
| L occipital pole                |                |                         | 7.20        | -12 | -96 | 6   |
| Color                           |                |                         |             |     |     |     |
| R parietal operculum cortex     | 1756           | 0.010                   | 4.77        | 48  | -21 | 24  |
| R superior frontal gyrus        |                |                         | 3.91        | 9   | 3   | 66  |
| R precentral gyrus              |                |                         | 3.58        | 18  | -18 | 69  |
| Animal-nonbiological-plant      |                |                         |             |     |     |     |
| R inferior frontal gyrus (BA44) | 1405           | 0.012                   | 6.05        | 54  | 15  | 27  |
| R inferior frontal gyrus (BA45) |                |                         | 5.27        | 52  | 24  | 18  |
| R frontal pole                  |                |                         | 4.35        | 51  | 39  | 3   |
| R inferior frontal gyrus (BA47) |                |                         | 3.34        | 33  | 30  | -18 |
| Semantic feature                |                |                         |             |     |     |     |
| R lingual gyrus                 | 1230           | 0.018                   | 4.44        | 12  | 78  | -12 |
| R lateral occipital cortex      |                |                         | 4.32        | 42  | -75 | -12 |
| R occipital fusiform gyrus      |                |                         | 4.29        | 39  | -72 | -12 |
| R inferior temporal gyrus (OT)  |                |                         | 3.43        | 45  | -60 | -15 |

678

679 MNI coordinates and significance levels are shown for the peak voxel in each cluster.  
680 Anatomical labels are provided for peak locations in each cluster. Effects in clusters smaller  
681 than 20 voxels not shown. OT = Occipito-temporal division.  
682  
683 Perceptual and semantic object processing irrespective of memory  
684 Searchlight analysis was also conducted for the perceptual and semantic model RDMS across  
685 all trials regardless of memory encoding (Fig. 5 and Table 2). The models showed significant  
686 fit to multivoxel activity patterns in several areas beyond the *a priori* ROIs. In particular, the  
687 effects for the color model were largely restricted to the right lateral occipital cortex, right  
688 middle temporal gyrus, and intracalcarine cortex, but also extended into the left lateral  
689 occipital cortex and supramarginal gyrus. Categorical semantic representations represented  
690 by the animal-nonbiological-plant domain were largely restricted to posterior parts of the  
691 ventral stream, highlighting the coarse nature of object information represented in the  
692 posterior ventral temporal cortex. This included the right temporal fusiform cortex, the right  
693 lingual gyrus, and the posterior division of parahippocampal cortex, but also extended into  
694 the middle temporal lobe. In contrast, representation of finer-grained semantic properties of  
695 objects extended more anteriorly in the ventral pathway beyond the preregistered ROIs, into  
696 bilateral hippocampus, temporal pole and ventromedial frontal regions.

697

## Main effect of model RDMs

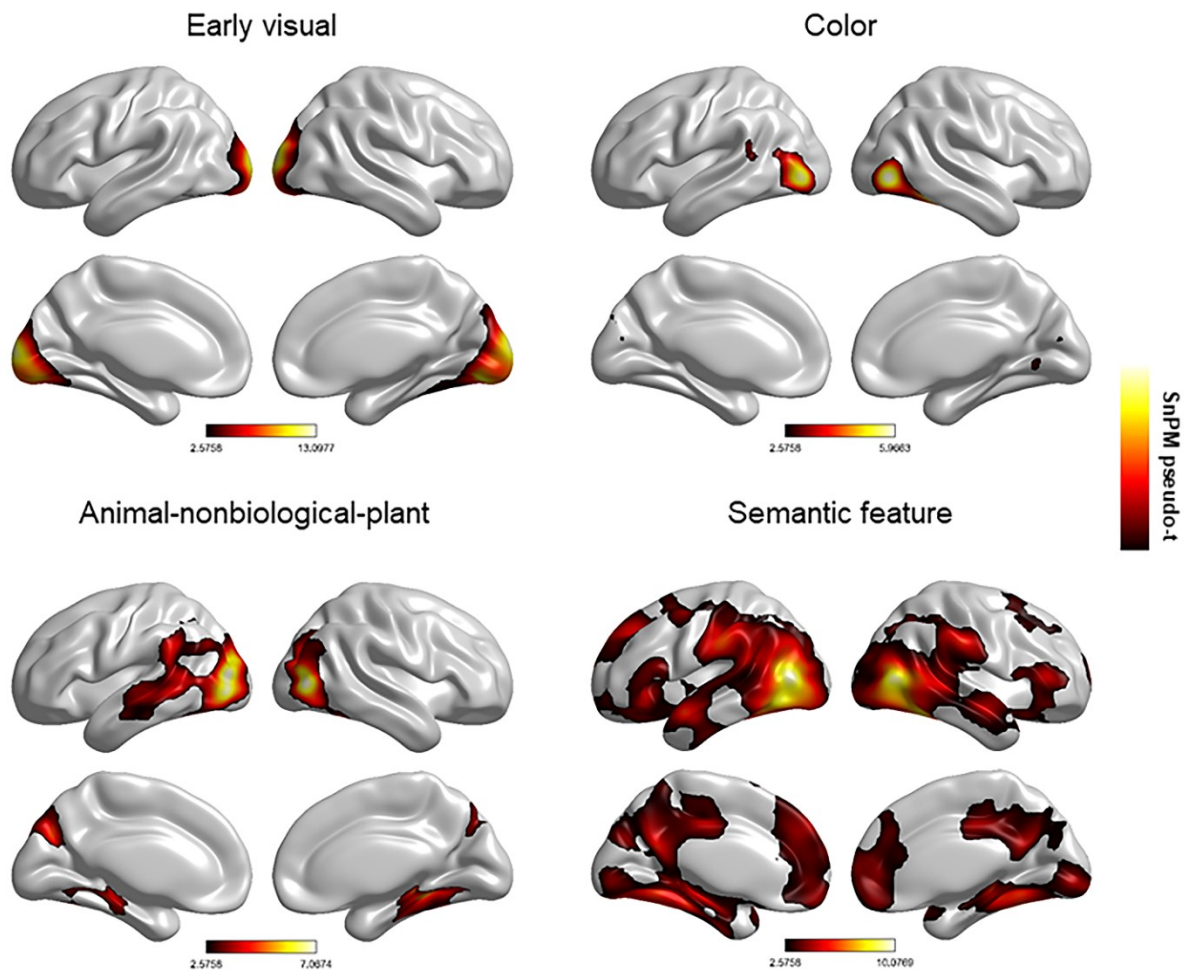

698

699 **Figure 8.** RSA searchlight results for perceptual and semantic models. The figure shows  
700 regions in which multivoxel activity pattern was associated with object processing (i.e.,  
701 irrespective of memory encoding). All significant clusters are shown at the FWE-corrected  
702 threshold used for analysis (see Materials and Methods: RSA searchlight analysis). Similarity  
703 maps are presented on an inflated representation of the cortex based on the normalized  
704 structural image averaged over participants.

705

706

707 **Table 2.** RSA results showing perceptual and semantic effect of object processing

| Regions                    | Cluster extent | Cluster-level $p$ (FWE) | Pseudo- $t$ | x   | y   | z   |
|----------------------------|----------------|-------------------------|-------------|-----|-----|-----|
| Early visual               |                |                         |             |     |     |     |
| R occipital pole           | 4844           | 0.002                   | 13.10       | 18  | -96 | 12  |
| L occipital pole           |                |                         | 13.02       | -15 | -99 | 6   |
| R occipital fusiform gyrus |                |                         | 11.53       | 18  | -78 | -12 |
| Color                      |                |                         |             |     |     |     |
| R lateral occipital cortex | 1121           | 0.019                   | 5.97        | 45  | -75 | -3  |
| R middle temporal gyrus    |                |                         | 3.45        | 36  | -57 | 15  |
| R intracalcarine cortex    |                |                         | 3.45        | 21  | -72 | 3   |
| L lateral occipital cortex | 714            | 0.044                   | 5.67        | -42 | -81 | -3  |
| L supramarginal gyrus      |                |                         | 3.66        | -60 | -48 | 15  |
| Animal-nonbiological-plant |                |                         |             |     |     |     |
| R lateral occipital cortex | 2110           | 0.005                   | 6.05        | 45  | -78 | 6   |
| R lingual gyrus            |                |                         | 5.98        | 30  | -39 | -6  |
| R temporal fusiform cortex |                |                         | 4.18        | 39  | -54 | -18 |
| L parahippocampal cortex   | 3865           | 0.002                   | 5.14        | -18 | -39 | -21 |
| L middle temporal gyrus    |                |                         | 4.58        | -63 | -42 | 0   |
| L supramarginal gyrus      |                |                         | 4.43        | -60 | -42 | 30  |
| Semantic feature           |                |                         |             |     |     |     |
| L lateral occipital cortex | 28111          | 0.000                   | 10.08       | -48 | -75 | 9   |
| R lateral occipital cortex |                |                         | 9.69        | 51  | -72 | 6   |
| R temporal fusiform cortex |                |                         | 8.12        | 42  | -51 | -15 |
| L temporal fusiform cortex |                |                         | 7.10        | -45 | -60 | -15 |
| L middle temporal gyrus    |                |                         | 6.46        | -60 | 0   | -18 |

|                                  |      |     |     |     |
|----------------------------------|------|-----|-----|-----|
| L hippocampus                    | 5.50 | -33 | -27 | -12 |
| L perirhinal cortex              | 4.58 | -27 | -12 | -36 |
| R inferior frontal gyrus (BA45)  | 4.20 | 51  | 27  | 0   |
| R inferior frontal gyrus (BA44)  | 4.10 | 51  | 18  | 9   |
| R ventromedial prefrontal cortex | 4.08 | 9   | 51  | -12 |
| L ventromedial prefrontal cortex | 4.03 | -6  | 51  | -12 |
| L inferior frontal gyrus (BA44)  | 4.02 | -51 | 18  | 12  |
| L ventral anterior temporal lobe | 3.84 | -45 | -9  | -39 |
| L inferior frontal gyrus (BA45)  | 3.62 | -51 | 27  | 0   |
| L temporal pole                  | 3.60 | -36 | 3   | -36 |
| R hippocampus                    | 3.34 | 33  | -12 | -18 |

708

709 MNI coordinates and significance levels shown for the peak voxel in each cluster.

710 Anatomical labels are provided for locations in each cluster. Effects in clusters smaller than

711 20 voxels not shown.

712

713 *Preregistered univariate fMRI analysis*

714 Encoding activity predicting true and false recognition

715 Univariate analysis was run to derive ROIs for RSA based on subsequent memory effects in

716 regions where prior literature is suggestive, but not clear, regarding their involvement. This

717 showed significant activation for subsequently remembered > subsequently forgotten items in

718 the LITG (cluster size:  $k = 13$ ,  $p < 0.05$  FWE). No significant activation was revealed for

719 subsequently falsely recognized > subsequently corrected rejected items after FWE

720 correction.

721

722 Parametric effect of concept confusability

723 Finally, we were interested in the specific role of the PrC, and possibly aVTC, in processing  
724 conceptually confusable objects. These regions were not related to parametric changes in  
725 concept confusability regardless of memory encoding. Therefore, we did not replicate Clarke  
726 and Tyler (2014)'s finding of increased activation for more conceptually confusable objects  
727 (uncorrected  $p = 0.139$  and  $p = 0.05$  for PrC and aVTC, respectively). Subsequent memory  
728 effects were also not significant at the preregistered FWE-corrected threshold. However, at an  
729 uncorrected threshold, activity associated with concept confusability was greater for  
730 subsequently forgotten than remembered items in right PrC (cluster size:  $k = 12$ ,  $p < 0.005$ )  
731 and bilateral aVTC (right cluster size:  $k = 19$ ,  $p < 0.001$ ; left cluster size:  $k = 6$ ,  $p < 0.001$ ).  
732 Activity associated with concept confusability was also greater for subsequently falsely  
733 recognized than correctly rejected items in bilateral PrC (right cluster size:  $k = 35$ ,  $p < 0.005$ ;  
734 left cluster size:  $k = 11$ ,  $p < 0.005$ ), and right aVTC (cluster size:  $k = 22$ ,  $p < 0.005$ ), and for  
735 subsequently falsely recognized than remembered items in bilateral PrC (right cluster size:  $k$   
736  $= 25$ ,  $p < 0.005$ ; left cluster size:  $k = 12$ ,  $p < 0.005$ ), and right aVTC (cluster size:  $k = 16$ ,  $p <$   
737  $0.005$ ).

## 738 Discussion

739 Our results show that semantic and perceptual representations play distinct roles in true and  
740 false memory encoding. By combining explicit models of prior conceptual knowledge and  
741 image properties with a subsequent memory paradigm, we were able to probe their separate  
742 contributions to encoding of objects. Fine-grained perceptual and semantic processing in the  
743 ventral visual pathway both predicted later recognition of studied objects, while coarser-  
744 grained categorical semantic information processed more anteriorly predicted forgetting. In  
745 contrast, only weak low-level visual representations in posterior regions predicted false

746 recognition of similar objects. The data provide the first direct tests of fuzzy-trace theory's  
747 assumptions about how memories are encoded, and suggest that semantic representations  
748 may contribute to specific as well as gist memory phenomena (Brainerd and Reyna, 2002).  
749  
750 Our results for the early visual model converge with studies showing univariate subsequent  
751 memory effects in the same regions (Kim and Cabeza, 2007; Kirchhoff et al., 2000; Pidgeon  
752 and Morcom, 2016; Wagner et al., 1998). Distributed low-level visual representations in early  
753 visual cortices predicted successful later recognition of specific studied objects. The C1  
754 HMax representations embody known properties of primary visual cortex relating to local  
755 edge-orientations in images (Kamitani and Tong, 2005), and this model clustered our object  
756 images by overall shape and orientation (Fig. 2). These results converge with Davis et al.  
757 (2020)'s recent finding that RSA model fit for an early layer of a deep convolutional neural  
758 network (DNN) in early visual cortex predicted later memory for pictures. Our models are  
759 directly interpretable, allowing us to show unambiguously that representing lower-level  
760 properties available in the presented images contributes to memory.  
761  
762 In late visual regions, such as LG and FG, activity patterns fitting the early visual model also  
763 predicted true recognition (Fig. 5 and 7), as hypothesized based on activation studies (Garoff  
764 et al., 2005; Kim, 2011; Kirchhoff et al., 2000; Stern et al., 1996; Vaidya et al., 2002). We  
765 also found that specific object features coded in FG predicted true recognition. These pVTC  
766 regions receive low-level properties as input to compute complex shape information  
767 (Kanwisher, 2001). Emerging data suggest that the FG supports visuo-semantic processing of  
768 modality-specific semantic features. Devereux et al. (2018) combined deep visual and  
769 semantic attractor networks to model the transformation of vision to semantics, revealing a  
770 confluence of late visual representations and early semantic feature representations in FG (see



771 also Tyler et al., 2013). This converges with Martin et al.'s (2018) finding that FG activity  
772 reflected representations of explicitly rated visual object features. Davis et al. (2020) reported  
773 that in FG the mid-layer of a visual DNN predicted memory for object names when the  
774 objects were forgotten, while semantic features of the object images predicted memory for  
775 the images when the names were forgotten. Our findings clarify that both image-based visual  
776 codes and non-image-based semantic feature codes are represented during successful  
777 encoding. Together, the data further suggest that this initial extraction of semantic features  
778 from vision is important for the effective encoding of memories of specific objects, more than  
779 false recognition of similar objects.

780

781 More anteriorly, taxonomic categorical representations in aVTC and left PrC predicted  
782 forgetting of studied items. Similar findings in LIFG support the idea that coarse-grained  
783 domain-level semantic processing is detrimental to memory for specific objects. LIFG  
784 typically shows strong univariate subsequent memory effects for verbal or nameable object  
785 stimuli (Kim, 2011). It is thought to support selection and control processes involved in  
786 elaborative semantic encoding (Jackson et al., 2015; Prince et al., 2007). Our overall analysis  
787 showed that object-specific semantic information was represented in this region, but did not  
788 predict recognition. One possibility is that domain-level taxonomic processing impeded  
789 selection of specific semantic information. Another possibility, in line with the levels of  
790 processing principle, is that the object naming encoding task did not strongly engage  
791 semantic control operations that promote subsequent memory ( Craik and Lockhart, 1972;  
792 Otten and Rugg, 2001). Object naming depends on basic-level object-specific processing in  
793 the FG, consistent with the current findings (Taylor et al., 2012). Future studies can test this  
794 by manipulating cognitive operations at encoding to determine whether the representations  
795 promoting later memory are also task-dependent.

796

797 The absence of any association between object-specific representations in PrC and encoding  
798 was unexpected, although we replicated Clarke and Tyler (2014)'s central finding that PrC  
799 represents object-specific semantic features. The PrC encodes complex conjunctions of visual  
800 (Barens et al., 2012; Bussey et al., 2002) and semantic features (Bruffaerts et al., 2013;  
801 Clarke and Tyler, 2014) that enable fine-grained object discrimination and may contribute to  
802 later item memory (Brown and Aggleton, 2001; Yonelinas et al., 2005). As the object-  
803 specific semantic model fit embodied both shared and distinctive feature information, we ran  
804 a further, univariate analysis to examine the directional effect of shared features (concept  
805 confusability). We did not replicate Clarke & Tyler's (2014) finding that PrC activation was  
806 higher overall for more confusable objects, interpreted in terms of feature disambiguation.  
807 However, we found preliminary evidence that in both PrC and vATL, activity correlating  
808 with concept confusability predicted forgetting of studied objects. This is consistent with our  
809 finding that concept confusability strongly impairs true recognition, as well as discrimination  
810 between studied objects and lures (Naspi et al., 2020), results replicated here. The RSA data  
811 also suggest an interpretation of Davis et al.'s (2020) report that semantic feature model fit in  
812 PrC predicted later true recognition of object concepts when their pictures were forgotten,  
813 which may correspond to nonspecific encoding.

814

815 An important and novel feature of our study is the investigation of the representational  
816 content associated with encoding of false memories. Our results revealed that weak visual  
817 representations coded in EVC and extending to LITG predicted later false recognition (Fig.  
818 5), and model fit differed significantly from true recognition. This supports fuzzy-trace  
819 theory's proposal that visual detail is encoded in specific memory traces that confer  
820 robustness to later true recognition (Brainerd and Reyna, 2002). Several univariate fMRI

821 studies of memory retrieval have shown greater early and late visual cortex activation for true  
822 than false memories of objects (Dennis et al., 2012; Karanian and Slotnick, 2017, 2018;  
823 Schacter and Slotnick, 2004). Of the few encoding studies, two have found occipital  
824 activation predicting true but not false recognition (Dennis et al., 2008; Kirchhoff et al., 2000;  
825 Pidgeon and Morcom, 2016; but see Garoff et al., 2005). Here, we not only show that  
826 visually specialized regions are engaged more when encoding true than false memories, but  
827 also characterize the visual features involved. Thus, insufficient early visual analysis at  
828 encoding leads to poor mnemonic discrimination of similar lures. This may prevent later  
829 recollection of details of the studied item that would allow people to reject the similar lures  
830 (recollection rejection; Brainerd et al., 2003). The RSA result is also consistent with the  
831 behavioral increase in false recognition for more visually confusable objects (see also Naspi  
832 et al., 2020).

833

834 We did not find any evidence here that semantic processing contributes to false memory  
835 encoding, and in FG, feature semantic representations impacted true memory encoding more  
836 strongly. Clearly, we cannot place weight on the null result, and our models did not  
837 comprehensively address all potential semantic processes but focused on concept-level  
838 processes we have shown to contribute behaviorally in this task (Naspi et al., 2020). Lateral  
839 and ventral temporal regions previously implicated in false memory encoding in verbal tasks  
840 did not show significant effects here (Dennis et al., 2007; Chadwick et al., 2016). These areas  
841 may support higher-level verbal semantics linking studied items to lures. Nonetheless, both in  
842 the current task and following deep semantic judgments at encoding (Naspi et al., 2020),  
843 concept confusability reduced lure false recognition relative to novel objects as well as true  
844 recognition. An intriguing possibility is that the semantic processes reducing lure false

845 recognition operate at retrieval rather than at encoding. This hypothesis will be tested using  
846 RSA analysis of retrieval phase brain activity in this task.

847

848 In conclusion, we have revealed some of the visual and semantic representations that allow  
849 people to form memories of specific objects and later reject similar novel objects. This is the  
850 first – to our knowledge – preregistered study of neural representations in memory encoding,  
851 and the first probe of representations predicting false recognition. Using previously validated  
852 representational models, we were able to disentangle low-level image properties from  
853 semantic feature processing. The data provide novel support for theoretical assumptions  
854 implicating visual detail in specific memory encoding, but suggest that semantic information  
855 may contribute to specific as well as gist memory. Our approach offers a path by which  
856 future studies can evaluate the respective roles of encoding and retrieval representations in  
857 true and false memory.

858

## 859 **References**

- 860 Abraham A, Pedregosa F, Eickenberg M, Gervais P, Mueller A, Kossaifi J, Gramfort A,  
861 Thirion B, Varoquaux G (2014) Machine learning for neuroimaging with scikit-learn.  
862 *Front Neuroinform* 8:1–10.
- 863 Amunts K, Malikovic A, Mohlberg H, Schormann T, Zilles K (2000) Brodmann’s areas 17  
864 and 18 brought into stereotaxic space - Where and how variable? *Neuroimage* 11:66–84.
- 865 Barense MD, Groen IIA, Lee ACH, Yeung LK, Brady SM, Gregori M, Kapur N, Bussey TJ,  
866 Saksida LM, Henson RNA (2012) Intact memory for irrelevant information impairs  
867 perception in amnesia. *Neuron* 75:157–167.
- 868 Brainerd CJ, Reyna VF (1990) Gist is the grist: Fuzzy-trace theory and the new intuitionism.  
869 *Dev Rev* 10:3–47.
- 870 Brainerd CJ, Reyna VF (2002) Fuzzy-trace theory and false memory. *Curr Dir Psychol Sci*  
871 11:164–169 Available at: <http://journals.sagepub.com/doi/10.1111/1467-8721.00192>.
- 872 Brainerd CJ, Reyna VF, Wright R, Mojardin AH (2003) Recollection rejection : False-  
873 memory editing in children and adults. *Psychol Rev* 110:762–784.
- 874 Brodeur MB, Guérard K, Bouras M (2014) Bank of Standardized Stimuli (BOSS) phase ii:  
875 930 new normative photos. *PLoS One* 9.
- 876 Brown MW, Aggleton JP (2001) Recognition memory: What are the roles of the perirhinal  
877 cortex and hippocampus? *Nat Rev Neurosci* 2:51–61.
- 878 Bruffaerts R, Dupont P, Peeters R, De Deyne S, Storms G, Vandenberghe R (2013)  
879 Similarity of fMRI activity patterns in left perirhinal cortex reflects semantic similarity  
880 between words. *J Neurosci* 33:18597–18607.
- 881 Buckner RL, Kelley WM, Petersen SE (1999) Frontal cortex contributes to human memory  
882 formation. *Nat Neurosci* 2:311–314.
- 883 Bussey TJ, Saksida LM, Murray EA (2002) Perirhinal cortex resolves feature ambiguity in

- 884 complex visual discriminations. *Eur J Neurosci* 15:365–374.
- 885 Chadwick MJ, Anjum RS, Kumaran D, Schacter DL, Spiers HJ, Hassabis D (2016) Semantic  
886 representations in the temporal pole predict false memories. *Proc Natl Acad Sci*  
887 113:10180–10185 Available at:  
888 <http://www.pnas.org/lookup/doi/10.1073/pnas.1610686113>.
- 889 Chen H, Zhou W, Yang J (2019) Dissociation of the perirhinal cortex and hippocampus  
890 during discriminative learning of similar objects. *J Neurosci* 39:6190–6201.
- 891 Clarke A, Tyler LK (2014) Object-specific semantic coding in human perirhinal cortex. *J*  
892 *Neurosci* 34:4766–4775 Available at:  
893 <http://www.jneurosci.org/content/34/14/4766.short>.
- 894 Clarke A, Tyler LK (2015) Understanding what we see: How we derive meaning from vision.  
895 *Trends Cogn Sci* 19:677–687 Available at: <http://dx.doi.org/10.1016/j.tics.2015.08.008>.
- 896 Connolly AC, Swaroop Guntupalli J, Gors J, Hanke M, Halchenko YO, Wu YC, Abdi H,  
897 Haxby J V. (2012) The representation of biological classes in the human brain. *J*  
898 *Neurosci* 32:2608–2618.
- 899 Cox RW, Chen G, Glen DR, Reynolds RC, Taylor PA (2017) FMRI clustering in AFNI:  
900 False-positive rates redux. *Brain Connect* 7:152–171.
- 901 Craik FIM, Lockhart RS (1972) Levels of processing: A framework for memory research. *J*  
902 *Verbal Learning Verbal Behav* 11:671–684.
- 903 Davis SW, Geib BR, Wing EA, Wang W-C, Hovhannisyan M, Monge ZA, Cabeza R (2020)  
904 Visual and semantic representations predict subsequent memory in perceptual and  
905 conceptual memory tests. *Cereb Cortex* 00:1–19.
- 906 Dennis NA, Bowman CR, Vandekar SN (2012) True and phantom recollection: An fMRI  
907 investigation of similar and distinct neural correlates and connectivity. *Neuroimage*  
908 59:2982–2993.

- 909 Dennis NA, Hayes SM, Prince SE, Madden DJ, Huettel SA, Cabeza R (2008) Effects of  
910 aging on the neural correlates of successful item and source memory encoding. *J Exp*  
911 *Psychol Learn Mem Cogn* 34:791–808.
- 912 Dennis NA, Kim H, Cabeza R (2007) Effects of aging on true and false memory formation:  
913 An fMRI study. *Neuropsychologia* 45:3157–3166.
- 914 Devereux BJ, Clarke A, Marouchos A, Tyler LK (2013) Representational similarity analysis  
915 reveals commonalities and differences in the semantic processing of words and objects.  
916 *J Neurosci* 33:18906–18916.
- 917 Devereux BJ, Clarke A, Tyler LK (2018) Integrated deep visual and semantic attractor neural  
918 networks predict fMRI pattern-information along the ventral object processing pathway.  
919 *Sci Rep* 8:1–12 Available at: <http://dx.doi.org/10.1038/s41598-018-28865-1>.
- 920 Devereux BJ, Tyler LK, Geertzen J, Randall B (2014) The Centre for Speech, Language and  
921 the Brain (CSLB) concept property norms. *Behav Res Methods* 46:1119–1127 Available  
922 at:  
923 [http://www.pubmedcentral.nih.gov/articlerender.fcgi?artid=4237904&tool=pmcentrez&](http://www.pubmedcentral.nih.gov/articlerender.fcgi?artid=4237904&tool=pmcentrez&rendertype=abstract)  
924 [rendertype=abstract](http://www.pubmedcentral.nih.gov/articlerender.fcgi?artid=4237904&tool=pmcentrez&rendertype=abstract).
- 925 Devlin JT, Price CJ (2007) Perirhinal contributions to human visual perception. *Curr Biol*  
926 17:1484–1488 Available at: <http://dx.doi.org/10.1016/j.cub.2007.07.066>.
- 927 Eickhoff SB, Stephan KE, Mohlberg H, Grefkes C, Fink GR, Amunts K, Zilles K (2005) A  
928 new SPM toolbox for combining probabilistic cytoarchitectonic maps and functional  
929 imaging data. *Neuroimage* 25:1325–1335.
- 930 Gabrieli JDE, Poldrack RA, Desmond JE (1998) The role of left prefrontal cortex in language  
931 and memory. *Proc Natl Acad Sci U S A* 95:906–913.
- 932 Garoff RJ, Slotnick SD, Schacter DL (2005) The neural origins of specific and general  
933 memory: The role of the fusiform cortex. *Neuropsychologia* 43:847–859.

- 934 Gonsalves B, Reber PJ, Gitelman DR, Parrish TB, Mesulam MM, Paller KA (2004) Neural  
935 evidence that vivid imagining can lead to false remembering. *Psychol Sci* 15:655–660.
- 936 Hoffman P, Binney RJ, Lambon Ralph MA (2015) Differing contributions of inferior  
937 prefrontal and anterior temporal cortex to concrete and abstract conceptual knowledge.  
938 *Cortex* 63:250–266 Available at: <http://dx.doi.org/10.1016/j.cortex.2014.09.001>.
- 939 Holdstock JS, Hocking J, Notley P, Devlin JT, Price CJ (2009) Integrating visual and tactile  
940 information in the perirhinal cortex. *Cereb Cortex* 19:2993–3000.
- 941 Jackson RL, Hoffman P, Pobric G, Ralph MAL (2015) The nature and neural correlates of  
942 semantic association versus conceptual similarity. *Cereb Cortex* 25:4319–4333.
- 943 Kamitani Y, Tong F (2005) Decoding the visual and subjective contents of the human brain.  
944 *Nat Neurosci* 8:679–685.
- 945 Kanwisher N, Downing P, Epstein R, Kourtzi Z (2001) Functional neuroimaging of  
946 visual recognition. In: *Handbook of Functional Neuroimaging of Cognition* (Cabeza R,  
947 Kingstone A, ed), pp. 109–151. The MIT Press, Cambridge, Massachusetts.
- 948 Karanian JM, Slotnick SD (2017) False memories for shape activate the lateral occipital  
949 complex. *Learn Mem* 24:552–556.
- 950 Karanian JM, Slotnick SD (2018) Confident false memories for spatial location are mediated  
951 by V1. *Cogn Neurosci* 9:139–150 Available at:  
952 <https://doi.org/10.1080/17588928.2018.1488244>.
- 953 Kay KN, Naselaris T, Prenger RJ, Gallant JL (2008) Identifying natural images from human  
954 brain activity. *Nature* 452:352–355.
- 955 Kim H (2011) Neural activity that predicts subsequent memory and forgetting: A meta-  
956 analysis of 74 fMRI studies. *Neuroimage* 54:2446–2461 Available at:  
957 <http://dx.doi.org/10.1016/j.neuroimage.2010.09.045>.
- 958 Kim H, Cabeza R (2007) Differential contributions of prefrontal, medial temporal, and



- 959 sensory-perceptual regions to true and false memory formation. *Cereb Cortex* 17:2143–  
960 2150.
- 961 Kleiner M, Brainard D, Pelli D, Ingling A, Murray R, Broussard C (2007) What's new in  
962 psychtoolbox-3. *Perception* 36:1–16.
- 963 Kirchhoff BA, Wagner AD, Maril A, Stern CE (2000) Prefrontal-temporal circuitry for  
964 episodic encoding and subsequent memory. *J Neurosci* 20:6173–6180.
- 965 Kriegeskorte N, Kievit RA (2013) Representational geometry: Integrating cognition,  
966 computation, and the brain. *Trends Cogn Sci* 17:401–412 Available at:  
967 <http://dx.doi.org/10.1016/j.tics.2013.06.007>.
- 968 Kriegeskorte N, Mur M, Bandettini P (2008) Representational similarity analysis –  
969 connecting the branches of systems neuroscience. *Front Syst Neurosci* 2:1–28 Available  
970 at: <http://journal.frontiersin.org/article/10.3389/neuro.06.004.2008/abstract>.
- 971 Kundu P, Voon V, Balchandani P, Lombardo M V., Poser BA, Bandettini PA (2017) Multi-  
972 echo fMRI: A review of applications in fMRI denoising and analysis of BOLD signals.  
973 *Neuroimage* 154:59–80.
- 974 Lambon Ralph MA, Jefferies E, Patterson K, Rogers TT (2017) The neural and  
975 computational bases of semantic cognition. *Nat Rev Neurosci* 18:42–55 Available at:  
976 <http://dx.doi.org/10.1038/nrn.2016.150>.
- 977 Mahon BZ, Anzellotti S, Schwarzbach J, Zampini M, Caramazza A (2009) Category-specific  
978 organization in the human brain does not require visual experience. *Neuron* 63:397–405  
979 Available at: <http://dx.doi.org/10.1016/j.neuron.2009.07.012>.
- 980 Martin CB, Douglas D, Newsome RN, Man LLY, Barense MD (2018) Integrative and  
981 distinctive coding of visual and conceptual object features in the ventral visual stream.  
982 *Elife* 7:1–29.
- 983 Millard SP, Neerchal NK (2001) *Environmental Statistics with S-PLUS*.

- 984 Morcom AM, Good CD, Frackowiak RSJ, Rugg MD (2003) Age effects on the neural  
985 correlates of successful memory encoding. *Brain* 126:213–229.
- 986 Mumford JA, Turner BO, Ashby FG, Poldrack RA (2012) Deconvolving BOLD activation in  
987 event-related designs for multivoxel pattern classification analyses. *Neuroimage*  
988 59:2636–2643 Available at: <http://dx.doi.org/10.1016/j.neuroimage.2011.08.076>.
- 989 Naspi L, Hoffman P, Devereux B, Thejll-Madsen T, Doumas L, Morcom AM (2020)  
990 Multiple dimensions of semantic and perceptual similarity contribute to mnemonic  
991 discrimination for pictures. <https://psyarxiv.com/qt5wc/>. 10.31234/osf.io/qt5wc
- 992 Norman KA, O'Reilly RC (2003) Modeling hippocampal and neocortical contributions to  
993 recognition memory: A complementary-learning systems approach. *Psychol Rev*  
994 110:611–646.
- 995 Okado Y, Stark CEL (2005) Neural activity during encoding predicts false memories created  
996 by misinformation. *Learn Mem* 12:3–11.
- 997 Otten LJ, Rugg MD (2001) Task-dependency of the neural correlates of episodic encoding as  
998 measured by fMRI. *Cereb Cortex* 11:1150–1160.
- 999 Penny WD, Trujillo-Barreto NJ, Friston KJ (2005) Bayesian fMRI time series analysis with  
1000 spatial priors. *Neuroimage* 24:350–362.
- 1001 Pidgeon LM, Morcom AM (2016) Cortical pattern separation and item-specific memory  
1002 encoding. *Neuropsychologia* 85:256–271 Available at:  
1003 <http://dx.doi.org/10.1016/j.neuropsychologia.2016.03.026>.
- 1004 Prince SE, Tsukiura T, Cabeza R (2007) Distinguishing the neural correlates of episodic  
1005 memory encoding and semantic memory retrieval. *Psychol Sci* 18:144–151.
- 1006 Riesenhuber M, Poggio T (1999) Hierarchical models of object recognition in cortex. *Nat*  
1007 *Neurosci* 2:1019–1025.
- 1008 Rubner Y, Tomasi C, Guibas LJ (2000) The Earth Mover ' s Distance as a Metric for Image

- 1009 Retrieval. *Int J Comput Vis* 40:99–121.
- 1010 Schacter DL, Slotnick SD (2004) The cognitive neuroscience of memory distortion. *Neuron*  
1011 44:149–160.
- 1012 Serre T, Wolf L, Bileschi S, Riesenhuber M, Poggio T (2007) Robust object recognition with  
1013 cortex-like mechanisms. *IEEE Trans Pattern Anal Mach Intell* 29:411–426 Available at:  
1014 <http://dx.doi.org/10.1109/TPAMI.2007.56>.
- 1015 Standing L (1973) Learning 10,000 pictures. *QuartJExpPsychol* 25:207–222.
- 1016 Staresina BP, Henson RNA, Kriegeskorte N, Alink A (2012) Episodic reinstatement in the  
1017 medial temporal lobe. *J Neurosci* 32:18150–18156 Available at:  
1018 <http://www.jneurosci.org/cgi/doi/10.1523/JNEUROSCI.4156-12.2012>.
- 1019 Stern CE, Corkin S, González RG, Guimaraes AR, Baker JR, Jennings PJ, Carr CA, Sugiura  
1020 RM, Vedantham V, Rosen BR (1996) The hippocampal formation participates in novel  
1021 picture encoding: Evidence from functional magnetic resonance imaging. *Proc Natl*  
1022 *Acad Sci U S A* 93:8660–8665.
- 1023 Taylor KI, Devereux BJ, Acres K, Randall B, Tyler LK (2012) Contrasting effects of feature-  
1024 based statistics on the categorisation and basic-level identification of visual objects.  
1025 *Cognition* 122:363–374 Available at: <http://dx.doi.org/10.1016/j.cognition.2011.11.001>.
- 1026 Tyler LK, Chiu S, Zhuang J, Randall B, Devereux BJ, Wright P, Clarke A, Taylor KI (2013)  
1027 Objects and categories : Feature statistics and object processing in the ventral stream. *J*  
1028 *Cogn Neurosci* 25:1723–1735.
- 1029 Vaidya CJ, Zhao M, Desmond JE, Gabrieli JDE (2002) Evidence for cortical encoding  
1030 specificity in episodic memory: Memory-induced re-activation of picture processing  
1031 areas. *Neuropsychologia* 40:2136–2143.
- 1032 Wagner AD, Schacter DL, Rotte M, Koutstaal W, Maril A, Dale AM, Rosen BR, Buckner  
1033 RL (1998) Building memories: Remembering and forgetting of verbal experiences as

- 1034 predicted by brain activity. *Science* (80- ) 281:1188–1191.
- 1035 Walther A, Nili H, Ejaz N, Alink A, Kriegeskorte N, Diedrichsen J (2016) Reliability of  
1036 dissimilarity measures for multi-voxel pattern analysis. *Neuroimage* 137:188–200  
1037 Available at: <http://dx.doi.org/10.1016/j.neuroimage.2015.12.012>.
- 1038 Weller HI, Westneat MW (2019) Quantitative color profiling of digital images with earth  
1039 mover’s distance using the R package *colordistance*. *PeerJ* 7:1–31.
- 1040 Winters BD, Bussey TJ (2005) Transient inactivation of perirhinal cortex disrupts encoding,  
1041 retrieval, and consolidation of object recognition memory. *J Neurosci* 25:52–61.
- 1042 Xia M, Wang J, He Y (2013) BrainNet Viewer : A network visualization tool for human brain  
1043 connectomics. *PLoS One* 8:1–15.
- 1044 Yonelinas AP, Otten LJ, Shaw RN, Rugg MD (2005) Separating the brain regions involved  
1045 in recollection and familiarity in recognition memory. *J Neurosci* 25:3002–3008.
- 1046 Zhu B, Chen C, Shao X, Liu W, Ye Z, Zhuang L, Zheng L (2019) Multiple interactive  
1047 memory representations underlie the induction of false memory. *PNAS* 116:3466–3475.
- 1048
